# Supplementary material
Source: PubMed Central journal article supplement (PMC6985937)
Supplement: jm9b01741_si_001.pdf [file jm9b01741_si_001.pdf]

## Supplemental Information

### Selectivity and Physicochemical Optimization of Repurposed Pyrazolo[1,5-*b*]pyridazines for the Treatment of Human African Trypanosomiasis

Westley F. Tear,<sup>a</sup> Seema Bag,<sup>a</sup> Rosario Diaz-Gonzalez,<sup>b</sup> Gloria Ceballos-Pérez, Domingo I. Rojas-Barros,<sup>b</sup> Carlos Cordon-Obras,<sup>b\*</sup> Guiomar Pérez-Moreno,<sup>b</sup> Raquel García-Hernández,<sup>b</sup> Maria Santos Martinez-Martinez,<sup>c</sup> Luis Miguel Ruiz-Perez,<sup>b</sup> Francisco Gamarro,<sup>b</sup> Dolores Gonzalez Pacanowska,<sup>b</sup> Conor R. Caffrey,<sup>d</sup> Lori Ferrins,<sup>a</sup> Pilar Manzano,<sup>c</sup> Miguel Navarro,<sup>b</sup> Michael P. Pollastri<sup>a\*\*</sup>

<sup>a</sup>Northeastern University Department of Chemistry & Chemical Biology, 360 Huntington Avenue, Boston, MA 02115, USA.

<sup>b</sup>Instituto de Parasitología y Biomedicina “López-Neyra” Consejo Superior de Investigaciones Científicas (CSIC), Granada 18016, Spain.

\*current email address: carlos.cordon-obras@pasteur.fr

<sup>c</sup>Tres Cantos Medicines Development Campus, DDW and CIB, GlaxoSmithKline, Tres Cantos, Spain.

<sup>d</sup>Center for Discovery and Innovation in Parasitic Diseases, Skaggs School of Pharmacy and Pharmaceutical Sciences, University of California San Diego, 9500 Gilman Drive, La Jolla, CA 92093, USA.

\*\*Corresponding author

#### Table of Contents

**Table S1.** Measured pEC<sub>50</sub> values from original hits at different time points against *T. b. brucei*. Compounds with a pEC<sub>50</sub> ≥ 6 at 18 h were deemed fast acting. The pEC<sub>99</sub> values were determined by incubating compound with the parasite for 18 h, then washing out the compound and incubating for 72 h, to determine the minimal trypanocidal concentration (EC<sub>99</sub>) which abolishes 99 % of growth recovery. Compounds with a pEC<sub>99</sub> ≥ 6 were deemed cidal.<sup>1</sup> .....3

|                                                                                                                                                                                                                                                                                                                                                                                                                                                                                                                                                                                                                                                                                                                   |    |
|-------------------------------------------------------------------------------------------------------------------------------------------------------------------------------------------------------------------------------------------------------------------------------------------------------------------------------------------------------------------------------------------------------------------------------------------------------------------------------------------------------------------------------------------------------------------------------------------------------------------------------------------------------------------------------------------------------------------|----|
| <b>Table S2.</b> Expanded table of R <sup>1</sup> and R <sup>3</sup> substituents activity against <i>T. b. brucei</i> and ADME properties. ...                                                                                                                                                                                                                                                                                                                                                                                                                                                                                                                                                                   | 3  |
| <b>Figure S1.</b> Comparison of <i>T. b. brucei</i> pEC <sub>50</sub> inhibition data to literature values for <b>a.</b> GSK-3β pIC <sub>50</sub> ; <b>b.</b> CDK-2 pIC <sub>50</sub> ; <b>c.</b> CDK-4 pIC <sub>50</sub> . Colored on whether there was no substitution at R <sup>1</sup> and R <sup>2</sup> (blue), substitution at R <sup>1</sup> (orange), or substitution at R <sup>2</sup> (grey).....                                                                                                                                                                                                                                                                                                      | 12 |
| <b>Table S3.</b> Mouse plasma stability in CD-1 mouse cells. Compounds were dosed at 5μM and incubated for 2 h, with CD-1 cells and K2-EDTA as an anticoagulant.....                                                                                                                                                                                                                                                                                                                                                                                                                                                                                                                                              | 13 |
| <b>Table S4.</b> Measured % Stability of the compounds and fold induction of hydroxylation of testosterone to hydroxytestosterone in cytochrome P450 (CYP450) isozymes 3A4 after 2 h. Both compounds were deemed to not induce or be substrates of CYP450 3A4. ....                                                                                                                                                                                                                                                                                                                                                                                                                                               | 13 |
| <b>Table S5.</b> Measured permeability between Apical (A) and Basal (B) plasma membrane domains of Caco-2 cells. Compounds were dosed either in the A or B receiver compartment, then measured after 2 h. The apparent permeability (P <sub>app</sub> ) is equal to dQ/(dt*X*C <sub>0</sub> ) where dQ/dt = amount of product present in basal (A-B) or apical (B-A) in function of time (nmol/s), X = area of transwell (cm <sup>2</sup> ) and C <sub>0</sub> = initial concentration of product (nmol/ml) applied in apical or basal compartment. Compounds with a P <sub>app</sub> > 1*10 <sup>-6</sup> (cm/s) are deemed highly permeable. Compounds with an efflux ratio > 2 are deemed to be effluxed. .... | 13 |
| <b>Table S6.</b> Measured pEC <sub>50</sub> values at different time points against <i>T. b. brucei</i> . Compounds with a pEC <sub>50</sub> ≥ 6 at 18 h were deemed fast acting. The washout value was obtained after incubating <i>T. b. brucei</i> with the compound for 18 h, then washing out the compound, and incubating the parasite for 72 h; compounds with a pEC <sub>99</sub> ≥ 6 were deemed cidal.....                                                                                                                                                                                                                                                                                              | 14 |
| <b>Figure S2.</b> Peripheral blood levels of <b>20r</b> after IP administration to female NMRI mice (n=3) at a target dose 10 mg/kg in 1% DMSO, 20% Captisol® in water. Individual values for each time point are represented in the plot.....                                                                                                                                                                                                                                                                                                                                                                                                                                                                    | 14 |
| <b>Table S7.</b> Blood and brain levels of <b>20r</b> , after IP administration of 10 mg/kg single dose (target dose) to female NMRI mice (n=3). LLOQ=10 ng/mL(blood); 50 ng/g (brain). ....                                                                                                                                                                                                                                                                                                                                                                                                                                                                                                                      | 14 |
| <b>Table S8.</b> Blood and brain levels of <b>20g</b> , after IP administration of 10 mg/kg single dose (target dose) to female NMRI mice (n=3). ....                                                                                                                                                                                                                                                                                                                                                                                                                                                                                                                                                             | 15 |
| <b>Table S9.</b> Percentage inhibition of <b>20g</b> against human kinase panel (Eurofins) at 1 μM. ....                                                                                                                                                                                                                                                                                                                                                                                                                                                                                                                                                                                                          | 15 |
| <b>Table S10.</b> Parasitemia levels (measured as parasites per milliliter) of <i>T. b. brucei</i> STIB795 from efficacy study of <b>20g</b> dosed at 10 mg/kg/day during 5-day treatment of mice. ....                                                                                                                                                                                                                                                                                                                                                                                                                                                                                                           | 16 |

**Table S11.** Measured activity of compounds against *Trypanosoma cruzi*, and *Leishmania donovani* as well as L6 and THP-1. ....17

**Table S.12.** Measured severity score of compounds (10  $\mu$ M) against adult *Schistosoma mansoni* at the indicated time points. Compounds were scored based on the non-mutually exclusive phenotypic responses of the parasite that involved changes in translucency, motility and ability to adhere to the substratum. Each response was awarded a score of 1 and added up to the maximum score of 4. Degeneracy or damage to the outer surface of the worm was scored as 4. The anthelmintic, niclosamide, was used as a positive control and causes degeneracy, tegumental damage and eventually death. ....19

**Table S.13.** SEM measurements for *T. b. brucei* and MRC5 activity. ....19

**Table S14.** HPLC trace of key compounds. ....21

**Table S1.** Measured pEC<sub>50</sub> values from original hits at different time points against *T. b. brucei*. Compounds with a pEC<sub>50</sub>  $\geq$  6 at 18 h were deemed fast acting. The pEC<sub>99</sub> values were determined by incubating compound with the parasite for 18 h, then washing out the compound and incubating for 72 h, to determine the minimal trypanocidal concentration (EC<sub>99</sub>) which abolishes 99 % of growth recovery. Compounds with a pEC<sub>99</sub>  $\geq$  6 were deemed cidal.<sup>1</sup>

| Cpd        | 6 h | 12 h | 18h | 24 h | pEC <sub>99</sub> |
|------------|-----|------|-----|------|-------------------|
| <b>10c</b> | 5.3 | 5.5  | 5.6 | 5.8  | 5.5               |
| <b>1</b>   | 6.3 | 7.2  | 7.3 | 7.5  | 7.1               |
| <b>10o</b> | 5.7 | 6.5  | 6.6 | 6.8  | 6.2               |
| <b>10e</b> | 5.2 | 6.4  | 6.6 | 6.8  | 6.3               |
| <b>10k</b> | 6.2 | 6.3  | 6.3 | 6.7  | 6.3               |
| <b>10r</b> | 6.3 | 6.8  | 7.2 | 7.5  | 6.7               |
| <b>10m</b> | 4.4 | 6.0  | 6.1 | 6.2  | 5.6               |
| <b>10i</b> | 4.4 | 4.7  | 4.8 | 5.3  | <i>nt</i>         |
| <b>10l</b> | 4.5 | 4.4  | 4.5 | 4.8  | 4.2               |
| <b>9</b>   | 5.1 | 5.5  | 5.8 | 6.2  | <i>nt</i>         |

*nt* = not tested

**Table S2.** Expanded table of R<sup>1</sup> and R<sup>3</sup> substituents activity against *T. b. brucei* and ADME properties.

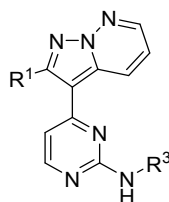

| Cpd | R <sup>1</sup>                                                                      | R <sup>3</sup>                                                                      | <i>T. b. brucei</i><br>pEC <sub>50</sub>                                           | Aq. Sol.<br>(μM) | LogD<br>7.4 | RH<br>Cl <sub>int</sub> * | HLM<br>Cl <sub>int</sub> ** | PPB<br>(%) | MRC 5<br>pTC <sub>50</sub> |
|-----|-------------------------------------------------------------------------------------|-------------------------------------------------------------------------------------|------------------------------------------------------------------------------------|------------------|-------------|---------------------------|-----------------------------|------------|----------------------------|
| S1a | 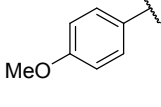   |    | 5.6 ± 0.13                                                                         | 1                | 3.6         | 74                        | 40                          | 98         | < 4.3 ± 0.00               |
| S1b |                                                                                     |    | 5.7 ± 0.21                                                                         | 1                | 4.8         | 59                        | 49                          | > 99       | < 4.3 ± 0.00               |
| 10f |    |    | 5.3 ± 0.07                                                                         | < 0.3            | > 4.3       | 10                        | 16                          | > 99       | < 4.3 ± 0.00               |
| S1c |                                                                                     |    | 5.3 ± 0.01                                                                         | 0.03             | > 4.3       | 19                        | 28                          | > 99       | < 4.3 ± 0.00               |
| S1d |                                                                                     |    | 5.5 ± 0.08                                                                         | < 2              | > 3.9       | nt                        | < 3                         | > 99       | < 4.3 ± 0.00               |
| S1e |                                                                                     |    | 5.3 ± 0.03                                                                         | < 0.09           | 4.3         | 56                        | < 3                         | 100        | < 4.3 ± 0.00               |
| S1f |                                                                                     |    | 4.4 ± 0.00                                                                         | < 0.1            | 4           | 15                        | < 3                         | > 99       | < 4.3 ± 0.00               |
| S1g |                                                                                     |  |  | < 4.4 ± 0.00     | 560         | 2.8                       | 21                          | 43         | 90                         |
| S1h |  |                                                                                     | 4.3                                                                                | 10               | 2.9         | 23                        | 49                          | 93         | < 4.3 ± 0.00               |
| S1i |  |                                                                                     | 5.6 ± 0.11                                                                         | < 6              | nt          | 25                        | 87                          | 96         | < 4.3 ± 0.00               |
| S1j |  |                                                                                     | 5.3 ± 0.04                                                                         | 7                | 1.6         | < 1                       | < 3                         | 66         | < 4.3 ± 0.00               |
| S1k |  |                                                                                     | 4.6 ± 0.22                                                                         | 10               | 4.4         | > 300                     | 52                          | 99         | < 4.3 ± 0.00               |
| S2a |  |                                                                                     | < 4.4 ± 0.00                                                                       | 11               | 2.9         | 78                        | 32                          | 94         | < 4.3 ± 0.00               |
| 21a |  |  | 5.9 ± 0.01                                                                         | nt               | nt          | nt                        | nt                          | nt         | < 4.9 ± 0.00               |
| 21b |  |                                                                                     | 6.2 ± 0.08                                                                         | 0.2              | 4.8         | 37                        | 16                          | 97         | < 4.3 ± 0.00               |
| 21c |  |                                                                                     | 4.9 ± 0.04                                                                         | 12               | 2.8         | 25                        | 46                          | 95         | < 4.3 ± 0.00               |
| 21d |  |                                                                                     | 6.5 ± 0.05                                                                         | 20               | 2.5         | 63                        | 240                         | 93         | < 4.3 ± 0.00               |

|            |                                                                                   |  |            |     |       |    |       |      |              |
|------------|-----------------------------------------------------------------------------------|--|------------|-----|-------|----|-------|------|--------------|
| <b>21e</b> |  |  | 6.2 ± 0.07 | 0.9 | 3.3   | 53 | > 300 | 99   | < 4.3 ± 0.00 |
| <b>21f</b> |  |  | 6.1 ± 0.07 | 2   | 2.9   | 27 | 150   | nt   | < 4.3 ± 0.00 |
| <b>21g</b> |  |  | 6.2 ± 0.04 | 28  | 4.4   | 83 | 100   | nt   | 4.5 ± 0.03   |
| <b>21h</b> |  |  | 6.7 ± 0.05 | 11  | > 4.2 | 18 | 80    | > 99 | < 4.3 ± 0.00 |

\* = (μL/min/10<sup>6</sup> cells)

\*\* = (μL/min/mg)

nt = not tested

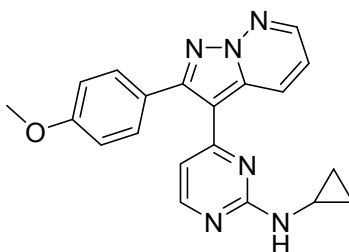

**N-Cyclopropyl-4-(2-(4-methoxyphenyl)pyrazolo[1,5-*b*]pyridazin-3-yl)pyrimidin-2-amine (S1a).** In a vial 3-(2-chloropyrimidin-4-yl)-2-(4-methoxyphenyl)pyrazolo[1,5-*b*]pyridazine **7f** (15 mg, 44 μmol), cyclopropylamine (6 μL, 87 μmol), and DIPEA (16 μL, 87 μmol) were stirred in *n*-BuOH and the reaction mixture was subjected to microwave irradiation at 150 °C for 1 h. Reaction mixture was then concentrated and column purification was performed using EtOAc: hex, 40-100%, 10 CV to provide the title compound as a buff solid (11 mg, 69%). <sup>1</sup>H NMR (500 MHz, CHLOROFORM-*d*) δ ppm 8.91 - 8.99 (m, 1 H) 8.36 (dd, *J*=4.40, 1.95 Hz, 1 H) 8.14 (d, *J*=5.37 Hz, 1 H) 7.62 - 7.69 (m, 2 H) 7.13 (dd, *J*=9.28, 4.39 Hz, 1 H) 6.96 - 7.03 (m, 2 H) 6.55 (d, *J*=5.37 Hz, 1 H) 3.89 (s, 3 H) 2.81 - 2.90 (m, 1 H) 0.83 - 0.92 (m, 2 H) 0.62 - 0.69 (m, 2 H). LC-MS (*m/z*): 359.0 [M+1].

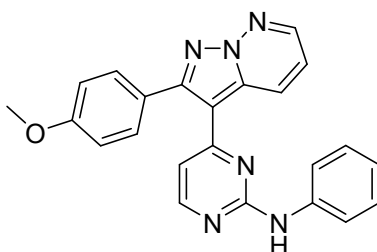

**4-(2-(4-Methoxyphenyl)pyrazolo[1,5-*b*]pyridazin-3-yl)-*N*-phenylpyrimidin-2-amine (S1b).** In a vial 3-(2-chloropyrimidin-4-yl)-2-(4-methoxyphenyl)pyrazolo[1,5-*b*]pyridazine **7f** (11 mg, 33 μmol), and aniline (6 μL, 65 μmol) were stirred in *n*-BuOH at 110 °C for 16 h. Reaction mixture was then concentrated and

column purification done on using EtOAc: hex, 40-100%, 8 CV followed by EtOAc: MeOH, 0-20%, 10 CV to afford the title compound as a beige solid (12 mg, 93%). <sup>1</sup>H NMR (500 MHz, CHLOROFORM-*d*) δ ppm 8.72 (dd, *J*=9.28, 1.95 Hz, 1 H) 8.37 (dd, *J*=4.40, 1.95 Hz, 1 H) 8.24 (d, *J*=5.37 Hz, 1 H) 7.60 - 7.69 (m, 4 H) 7.31 - 7.39 (m, 3 H) 7.06 - 7.12 (m, 2 H) 6.98 - 7.03 (m, 2 H) 6.67 (d, *J*=5.37 Hz, 1 H) 3.89 (s, 3 H). LC-MS (m/z): 395.0 [M+1].

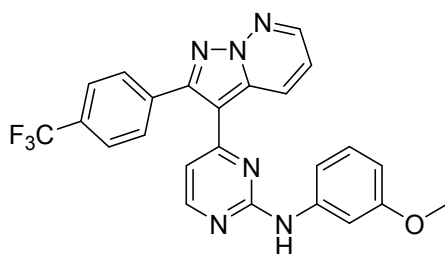

***N*-(3-Methoxyphenyl)-4-(2-(4-(trifluoromethyl)phenyl)pyrazolo[1,5-*b*]pyridazin-3-yl)pyrimidin-2-amine (S1c)**. To an oven-dried flask containing a solution of 3-(2-chloropyrimidin-4-yl)-2-(4-(trifluoromethyl)phenyl)pyrazolo[1,5-*b*]pyridazine **7d** (20 mg, 53 μmol) in 1 mL *n*-BuOH was added *m*-anisidine (12 μL, 106 μmol) and the reaction was heated to 110 °C for 16 h. Solid ppt seen in the vial. After completion, the reaction was concentrated to dryness and purified by column chromatography using EtOAc: hex, 20-100% 12 CV to afford the title compound as a yellow solid (20 mg, 81%). <sup>1</sup>H NMR (500 MHz, CHLOROFORM-*d*) δ ppm 8.75 (dd, *J*=8.79, 1.95 Hz, 1 H) 8.45 (dd, *J*=4.39, 1.95 Hz, 1 H) 8.22 (d, *J*=5.37 Hz, 1 H) 7.91 (br. s., 1 H) 7.86 (d, *J*=8.30 Hz, 2 H) 7.75 (d, *J*=8.30 Hz, 2 H) 7.37 (t, *J*=2.44 Hz, 1 H) 7.25 - 7.28 (m, 1 H) 7.17 (dd, *J*=8.79, 4.39 Hz, 1 H) 7.13 (dd, *J*=7.81, 2.44 Hz, 1 H) 6.69 (dd, *J*=7.81, 2.44 Hz, 1 H) 6.59 (d, *J*=5.37 Hz, 1 H) 3.80 (s, 3 H). LC-MS (m/z): 463.1 [M+1].

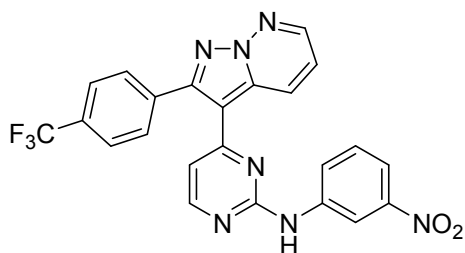

***N*-(3-Nitrophenyl)-4-(2-(4-(trifluoromethyl)phenyl)pyrazolo[1,5-*b*]pyridazin-3-yl)pyrimidin-2-amine (S1d).** To an oven-dried flask containing a solution of 3-(2-chloropyrimidin-4-yl)-2-(4-(trifluoromethyl)phenyl)pyrazolo[1,5-*b*]pyridazine **7d** (20 mg, 53  $\mu$ mol) in *n*-BuOH, 3-nitroaniline (15 mg, 106  $\mu$ mol) was added and the reaction was heated to 110 °C for 16 h. A precipitate was filtered out and washed with methanol followed by diethyl ether and dried under high vacuum to provide the title compound as a solid (16 mg, 63%). <sup>1</sup>H NMR (500 MHz, DMSO-*d*<sub>6</sub>)  $\delta$  ppm 10.22 (s, 1 H) 8.83 - 8.91 (m, 1 H) 8.79 (t, *J*=2.44 Hz, 1 H) 8.69 (dd, *J*=4.40, 1.95 Hz, 1 H) 8.50 (d, *J*=5.37 Hz, 1 H) 7.96 - 8.01 (m, 1 H) 7.90 (d, *J*=8.30 Hz, 2 H) 7.84 (d, *J*=8.30 Hz, 2 H) 7.76 (dd, *J*=8.30, 2.44 Hz, 1 H) 7.44 - 7.54 (m, 2 H) 6.77 (d, *J*=5.37 Hz, 1 H). LC-MS (*m/z*): 478.0 [M+1].

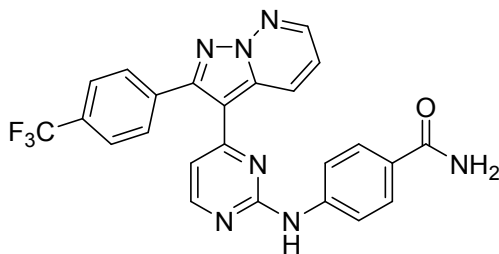

**4-((4-(2-(4-(Trifluoromethyl)phenyl)pyrazolo[1,5-*b*]pyridazin-3-yl)pyrimidin-2-yl)amino)benzamide (S1e).** To an oven-dried flask containing a solution of 3-(2-chloropyrimidin-4-yl)-2-(4-(trifluoromethyl)phenyl)pyrazolo[1,5-*b*]pyridazine **7d** (20 mg, 53  $\mu$ mol) in *n*-BuOH, 4-aminobenzamide (15 mg, 110  $\mu$ mol) was added and the reaction was heated to 110 °C for 16 h. After 16 h additional 4-aminobenzamide (30 mg, 220  $\mu$ mol) was added the reaction mixture was heated to 110 °C for another 16 h. A precipitate was filtered and washed with methanol followed by diethyl ether and dried under high vacuum to provide the title compound as an off-white solid (12 mg, 47%). <sup>1</sup>H NMR (500 MHz, DMSO-*d*<sub>6</sub>)  $\delta$  ppm 9.95 (s, 1 H) 8.83 - 8.91 (m, 1 H) 8.68 (dd, *J*=4.39, 1.95 Hz, 1 H) 8.46 (d, *J*=5.37 Hz, 1 H) 7.86 - 7.93 (m, 4 H) 7.68 - 7.79 (m, 5 H) 7.50 (dd, *J*=8.79, 4.39 Hz, 1 H) 7.15 (br. s, 1 H) 6.72 (d, *J*=5.37 Hz, 1 H). LC-MS (*m/z*): 476.1 [M+1].

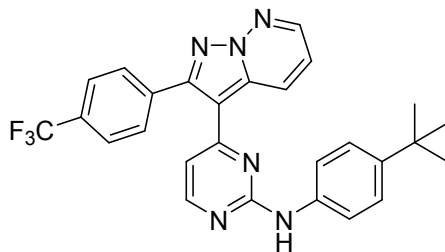

***N*-(4-(*tert*-Butyl)phenyl)-4-(2-(4-(trifluoromethyl)phenyl)pyrazolo[1,5-*b*]pyridazin-3-yl)pyrimidin-2-amine (S1f).** To an oven-dried flask containing a solution of 3-(2-chloropyrimidin-4-yl)-2-(4-(trifluoromethyl)phenyl)pyrazolo[1,5-*b*]pyridazine **7d** (20 mg, 53  $\mu$ mol) in *n*-BuOH, 4-(*tert*-butyl)aniline (17  $\mu$ L, 110  $\mu$ mol) was added and the reaction was heated to 110  $^{\circ}$ C for 16 h. Solid precipitation seen in the reaction vial, which was filtered and washed with methanol followed by diethyl ether and the product isolated was dried over high vacuum to afford the title compound as a yellow solid (17 mg, 65%).  $^1$ H NMR (500 MHz, DMSO- $d_6$ )  $\delta$  ppm 9.55 (s, 1 H) 8.78 - 8.85 (m, 1 H) 8.66 (dd,  $J=4.39$ , 1.95 Hz, 1 H) 8.39 (d,  $J=5.37$  Hz, 1 H) 7.85 - 7.93 (m, 4 H) 7.41 - 7.48 (m, 3 H) 7.18 (d,  $J=8.79$  Hz, 2 H) 6.64 - 6.69 (m, 1 H) 1.25 (s, 9 H). LC-MS ( $m/z$ ): 489.1 [M+1].

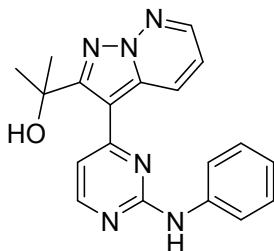

**2-(3-(2-(Phenylamino)pyrimidin-4-yl)pyrazolo[1,5-*b*]pyridazin-2-yl)propan-2-ol (S1g).** To an oven-dried flask containing a solution of 2-(3-(2-chloropyrimidin-4-yl)pyrazolo[1,5-*b*]pyridazin-2-yl)propan-2-ol **7g** (20 mg, 69  $\mu$ mol) in 1 mL *n*-BuOH, aniline (13  $\mu$ L, 140  $\mu$ mol) was added and the reaction was heated to 110  $^{\circ}$ C for 16 h. On completion the reaction was concentrated to dryness and purified by column chromatography using EtOAc: hex, 50-100% 12 CV to afford the title compound as a yellow solid (14 mg, 58%).  $^1$ H NMR (500 MHz, CHLOROFORM- $d$ )  $\delta$  ppm 8.47 (d,  $J=5.37$  Hz, 1 H) 8.37 (dd,  $J=4.39$ , 1.95 Hz, 1 H) 8.22 (dd,  $J=8.79$ , 1.95 Hz, 1 H) 7.65 (br. s, 1 H) 7.59 (d,  $J=7.81$  Hz, 2 H) 7.37 (t,  $J=7.81$  Hz, 2 H) 7.11 - 7.18 (m, 3 H) 1.72 (s, 6 H). LC-MS ( $m/z$ ): 347.7 [M+1].



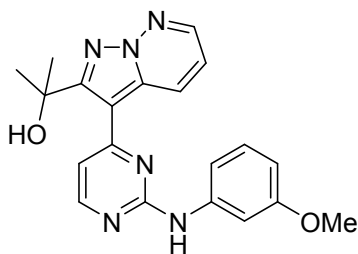

**2-(3-(2-((3-Methoxyphenyl)amino)pyrimidin-4-yl)pyrazolo[1,5-*b*]pyridazin-2-yl)propan-2-ol (S1h).**

To an oven-dried flask containing a solution of 2-(3-(2-chloropyrimidin-4-yl)pyrazolo[1,5-*b*]pyridazin-2-yl)propan-2-ol **7g** (30 mg, 104  $\mu\text{mol}$ ) in *n*-BuOH, 3-methoxyaniline (26  $\mu\text{L}$ , 207  $\mu\text{mol}$ ) was added and the reaction was heated to 110  $^{\circ}\text{C}$  for 16 h. After completion of reaction the reaction mixture was concentrated to dryness and purified by column chromatography using EtOAc: hex, 50-100% 12 CV to afford the title compound as a brown solid (12 mg, 32%).  $^1\text{H}$  NMR (500 MHz, CHLOROFORM-*d*)  $\delta$  ppm 8.49 (d,  $J=5.37$  Hz, 1 H) 8.36 (dd,  $J=4.39$ , 1.95 Hz, 1 H) 8.23 (dd,  $J=9.28$ , 1.95 Hz, 1 H) 7.65 (br. s., 1 H) 7.29 - 7.31 (m, 1 H) 7.25 (t,  $J=8.30$  Hz, 1 H) 7.12 - 7.18 (m, 2 H) 7.10 (d,  $J=5.37$  Hz, 1 H) 6.66 (dd,  $J=8.30$ , 2.44 Hz, 1 H) 3.81 (s, 3 H) 1.72 (s, 6 H). LC-MS ( $m/z$ ): 377.1 [ $\text{M}+1$ ].

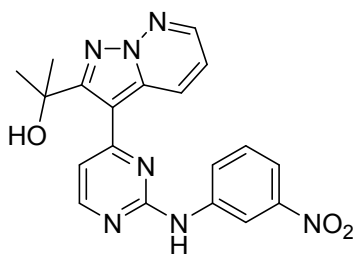

**2-(3-(2-((3-Nitrophenyl)amino)pyrimidin-4-yl)pyrazolo[1,5-*b*]pyridazin-2-yl)propan-2-ol (S1i).** To an oven-dried flask containing a solution of 2-(3-(2-chloropyrimidin-4-yl)pyrazolo[1,5-*b*]pyridazin-2-yl)propan-2-ol **7g** (20 mg, 69  $\mu\text{mol}$ ) in *n*-BuOH, 3-nitroaniline (19 mg, 140  $\mu\text{mol}$ ) was added and the reaction was heated to 110  $^{\circ}\text{C}$  for 16 h. On completion of reaction the reaction mixture was concentrated to dryness and purified by column chromatography using EtOAc: hex, 50-100% 12 CV to afford the title compound as a solid (14 mg, 52%).  $^1\text{H}$  NMR (500 MHz, CHLOROFORM-*d*)  $\delta$  ppm 8.82 (t,  $J=1.95$  Hz, 1 H) 8.54 (d,  $J=5.37$  Hz, 1 H) 8.40 (dd,  $J=4.40$ , 1.95 Hz, 1 H) 8.29 (dd,  $J=9.28$ , 1.95 Hz, 1 H) 7.93 - 7.97 (m,

1 H) 7.81 - 7.84 (m, 1 H) 7.50 (t,  $J=8.30$  Hz, 1 H) 7.37 (d,  $J=5.37$  Hz, 1 H) 7.21 (dd,  $J=9.28, 4.39$  Hz, 1 H) 1.75 - 1.77 (m, 6 H). LC-MS (m/z): 392.0 [M+1].

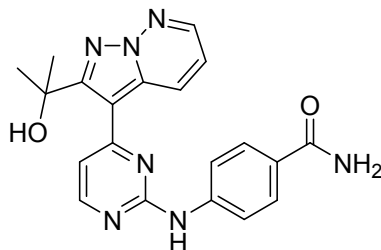

**4-((4-(2-(2-Hydroxypropan-2-yl)pyrazolo[1,5-*b*]pyridazin-3-yl)pyrimidin-2-yl)amino)benzamide**

**(S1j)**. To an oven-dried flask containing a solution of 2-(3-(2-chloropyrimidin-4-yl)pyrazolo[1,5-*b*]pyridazin-2-yl)propan-2-ol **7g** (20 mg, 69  $\mu\text{mol}$ ) in *n*-BuOH, 4-aminobenzamide (19 mg, 138  $\mu\text{mol}$ ) was added and the reaction was heated to 115  $^{\circ}\text{C}$  for 16 h. The reaction mixture was concentrated to dryness and purified by column chromatography using EtOAc: hex, 80-100% 5 CV, MeOH: EtOAc, 0-18% 12 CV) which yielded the title compound as a pale-yellow solid (10 mg, 37%).  $^1\text{H}$  NMR (500 MHz,  $\text{DMSO-}d_6$ )  $\delta$  ppm 9.89 (s, 1 H) 8.76 (dd,  $J=9.16, 1.53$  Hz, 1 H) 8.52 - 8.60 (m, 2 H) 7.77 - 7.88 (m, 6 H) 7.37 (dd,  $J=9.16, 4.27$  Hz, 1 H) 7.17 (br. s., 1 H) 5.96 (s, 1 H) 1.63 (s, 6 H). LC-MS (m/z): 390.1 [M+1].

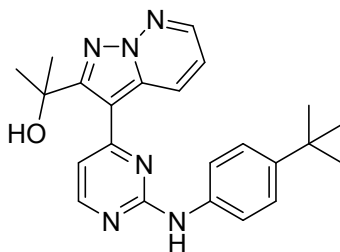

**2-(3-(2-(4-(*tert*-Butyl)phenyl)amino)pyrimidin-4-yl)pyrazolo[1,5-*b*]pyridazin-2-yl)propan-2-ol**

**(S1k)**. To an oven-dried flask containing a solution of 2-(3-(2-chloropyrimidin-4-yl)pyrazolo[1,5-*b*]pyridazin-2-yl)propan-2-ol **7g** (20 mg, 69  $\mu\text{mol}$ ) in *n*-BuOH, 4-(*tert*-butyl)aniline (22  $\mu\text{L}$ , 138  $\mu\text{mol}$ ) was added and the reaction was heated to 110  $^{\circ}\text{C}$  for 16 h. The reaction mixture was concentrated to dryness and purified by column chromatography using EtOAc: hex, 50-100% 12 CV to afford the title compound as a yellow solid (13 mg, 47%).  $^1\text{H}$  NMR (500 MHz,  $\text{CHLOROFORM-}d$ )  $\delta$  ppm 8.44 (d,  $J=5.37$  Hz, 1 H)

8.37 (dd,  $J=4.39$ , 1.95 Hz, 1 H) 8.24 (dd,  $J=9.28$ , 1.95 Hz, 1 H) 7.47 - 7.51 (m, 2 H) 7.38 - 7.42 (m, 2 H) 7.16 - 7.20 (m, 1 H) 7.14 (dd,  $J=9.28$ , 4.39 Hz, 1 H) 1.72 (s, 6 H) 1.34 (s, 9 H). LC-MS (m/z): 403.1 [M+1].

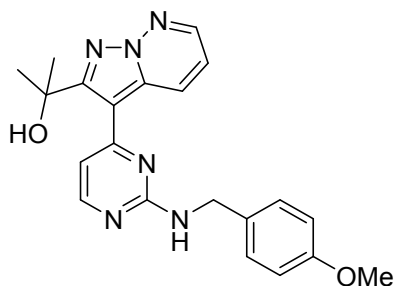

**2-(3-(2-((4-Methoxybenzyl)amino)pyrimidin-4-yl)pyrazolo[1,5-*b*]pyridazin-2-yl)propan-2-ol (S2a).**

To an oven-dried flask containing a solution of 2-(3-(2-chloropyrimidin-4-yl)pyrazolo[1,5-*b*]pyridazin-2-yl)propan-2-ol **7g** (20 mg, 69  $\mu\text{mol}$ ) in *n*-BuOH, 4-methoxybenzylamine (18  $\mu\text{L}$ , 138  $\mu\text{mol}$ ) was added and the reaction was heated to 115  $^{\circ}\text{C}$  for 16 h. The reaction mixture was concentrated to dryness and purified by column chromatography using EtOAc: hex, 50-100 % 12 CV to afford the title compound as a yellow solid (0.014 g, 51%).  $^1\text{H}$  NMR (500 MHz, CHLOROFORM-*d*)  $\delta$  ppm 8.24 - 8.40 (m, 2 H) 8.17 (dd,  $J=9.28$ , 1.95 Hz, 1 H) 7.28 - 7.32 (m, 2 H) 7.14 (dd,  $J=9.28$ , 4.39 Hz, 1 H) 6.95 (br. s, 1 H) 6.86 - 6.90 (m, 2 H) 4.60 (d,  $J=5.37$  Hz, 2 H) 3.78 - 3.84 (m, 3 H) 1.72 (s, 6 H). LC-MS (m/z): 391.1 [M+1].

**Figure S1.** Comparison of *T. b. brucei* pEC<sub>50</sub> inhibition data to literature values for **a.** GSK-3β pIC<sub>50</sub>; **b.** CDK-2 pIC<sub>50</sub>; **c.** CDK-4 pIC<sub>50</sub>. Colored on whether there was no substitution at R<sup>1</sup> and R<sup>2</sup> (blue), substitution at R<sup>1</sup> (orange), or substitution at R<sup>2</sup> (grey).

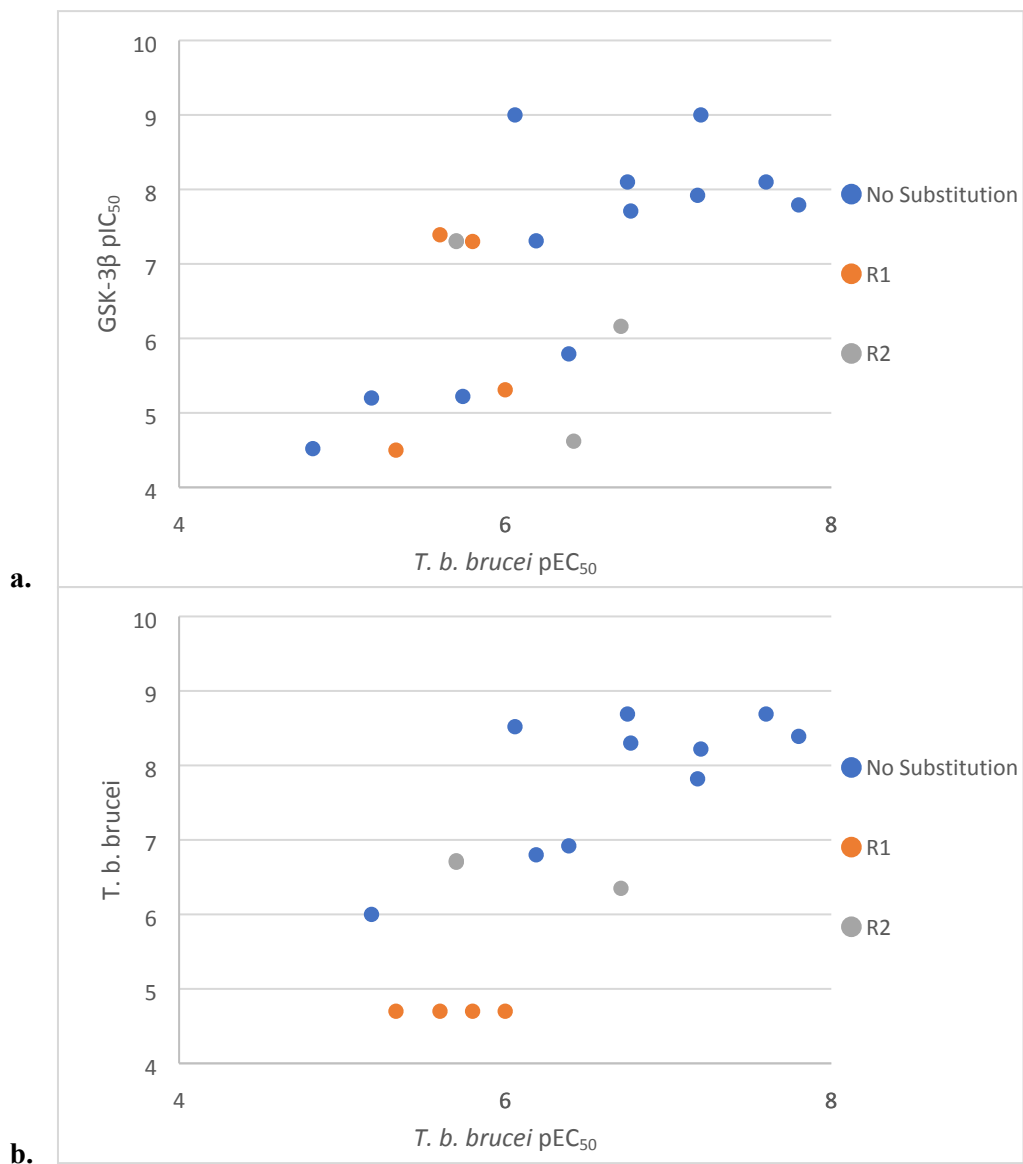

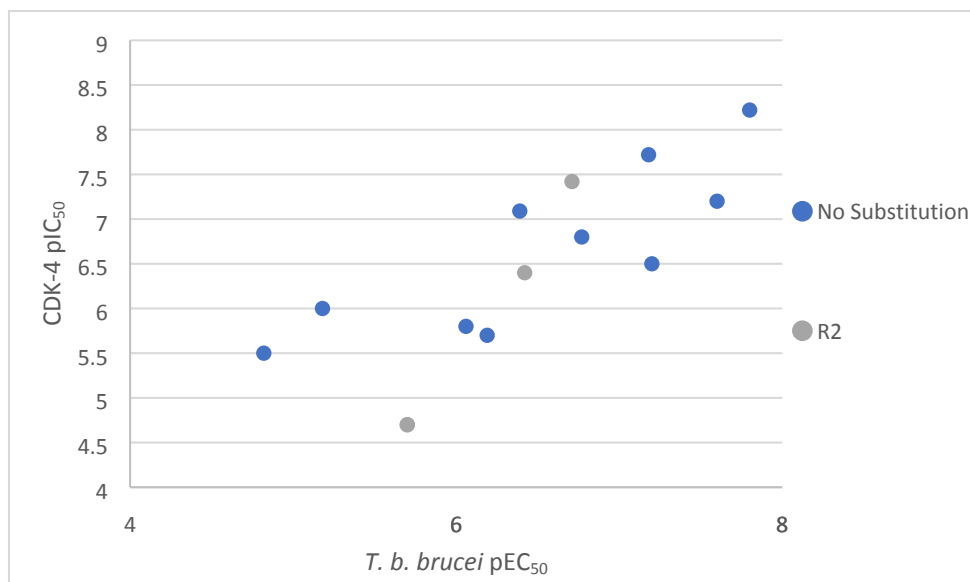

c.

**Table S3.** Mouse plasma stability in CD-1 mouse cells. Compounds were dosed at 5 $\mu$ M and incubated for 2 h, with CD-1 cells and K2-EDTA as an anticoagulant.

| Incubation Time (min) | % Compound Remaining |       |       |       |       |       |
|-----------------------|----------------------|-------|-------|-------|-------|-------|
|                       | 0                    | 10    | 20    | 30    | 60    | 120   |
| <b>20r</b>            | 100 %                | 99 %  | 101 % | 104 % | 104 % | 105 % |
| <b>20g</b>            | 100 %                | 100 % | 105 % | 109 % | 115 % | 116 % |

**Table S4.** Measured % Stability of the compounds and fold induction of hydroxylation of testosterone to hydroxytestosterone in cytochrome P450 (CYP450) isozymes 3A4 after 2 h. Both compounds were deemed to not induce or be substrates of CYP450 3A4.

| Cpd        | Fold Induction | % Stability |
|------------|----------------|-------------|
| <b>20r</b> | 0.32           | 87          |
| <b>20g</b> | 0.078          | 102         |

**Table S5.** Measured permeability between Apical (A) and Basal (B) plasma membrane domains of Caco-2 cells. Compounds were dosed either in the A or B receiver compartment, then measured after 2 h. The apparent permeability ( $P_{app}$ ) is equal to  $dQ/(dt \cdot X \cdot C_0)$  where  $dQ/dt$  = amount of product present in basal (A-B) or apical (B-A) in function of time (nmol/s),  $X$  = area of transwell ( $cm^2$ ) and  $C_0$  = initial concentration of product (nmol/ml) applied in apical or basal compartment. Compounds with a  $P_{app} > 1 \cdot 10^{-6}$  (cm/s) are deemed highly permeable. Compounds with an efflux ratio  $> 2$  are deemed to be effluxed.

| Cpd        | Mean $P_{app}$ A-B ( $10^{-6}$ cm/s) | Mean $P_{app}$ B-A ( $10^{-6}$ cm/s) | Mean (B-A/A-B) Efflux Ratio |
|------------|--------------------------------------|--------------------------------------|-----------------------------|
| <b>20r</b> | 42                                   | 53                                   | 1.3                         |
| <b>20g</b> | 32                                   | 33                                   | 1.0                         |

**Table S6.** Measured pEC<sub>50</sub> values at different time points against *T. b. brucei*. Compounds with a pEC<sub>50</sub> ≥ 6 at 18 h were deemed fast acting. The washout value was obtained after incubating *T. b. brucei* with the compound for 18 h, then washing out the compound, and incubating the parasite for 72 h; compounds with a pEC<sub>99</sub> ≥ 6 were deemed cidal.

| Cpd | 6 h         | 12 h        | 18h         | 24 h       | Washout pEC <sub>50</sub> | Washout pEC <sub>99</sub> |
|-----|-------------|-------------|-------------|------------|---------------------------|---------------------------|
| 12d | < 4.4 ± 0.0 | < 4.9 ± 0.0 | < 5.4 ± 0.0 | 6.6 ± 0.15 | 6.7 ± 0.06                | 6.5 ± 0.14                |
| 22a | 5.7 ± 0.07  | 6.3 ± 0.12  | 6.8 ± 0.10  | 6.8 ± 0.05 | 7.1 ± 0.08                | 6.8 ± 0.25                |
| 22b | 5.7 ± 0.04  | 6.1 ± 0.08  | 6.8 ± 0.17  | 6.9 ± 0.11 | 7.2 ± 0.06                | 6.2 ± 0.44                |
| 22c | 6.0 ± 0.24  | 7.1 ± 0.16  | 7.8 ± 0.14  | 8.4 ± 0.20 | 8.2 ± 0.09                | 7.2 ± 0.4                 |
| 20r | 5.3 ± 0.03  | 5.5 ± 0.20  | 5.9 ± 0.22  | 6.1 ± 0.11 | 6.4 ± 0.09                | 5.8 ± 0.31                |
| 20c | 5.4 ± 0.07  | 6.1 ± 0.20  | 6.9 ± 0.08  | 6.7 ± 0.10 | 6.9 ± 0.09                | 6.4 ± 0.07                |
| 20g | 5.9 ± 0.06  | 6.7 ± 0.12  | 7.1 ± 0.10  | 7.3 ± 0.08 | 7.4 ± 0.08                | 7.0 ± 0.11                |

**Figure S2.** Peripheral blood levels of **20r** after IP administration to female NMRI mice (n=3) at a target dose 10 mg/kg in 1% DMSO, 20% Captisol® in water. Individual values for each time point are represented in the plot.

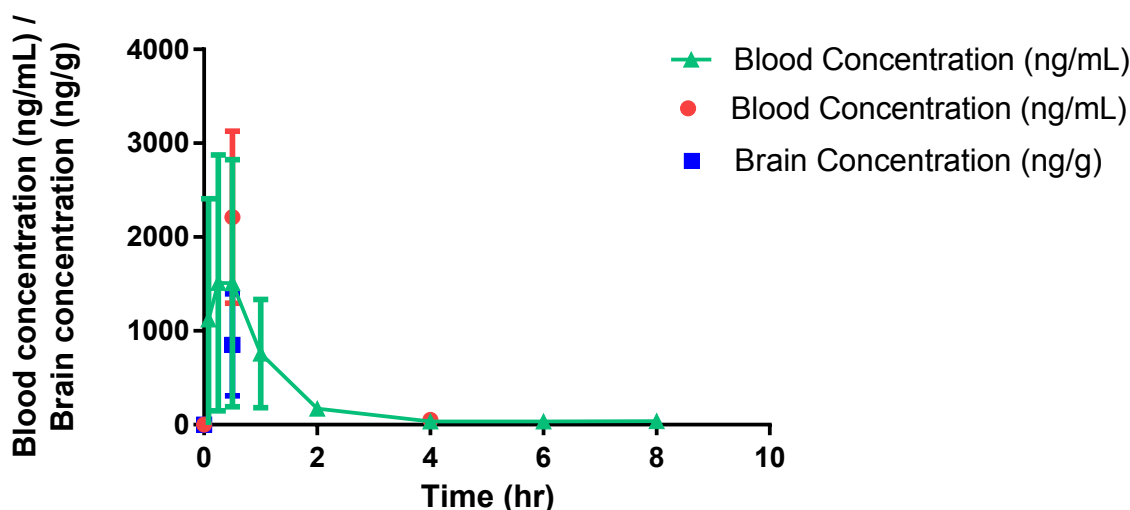

**Table S7.** Blood and brain levels of **20r**, after IP administration of 10 mg/kg single dose (target dose) to female NMRI mice (n=3). LLOQ=10 ng/mL(blood); 50 ng/g (brain).

| Sampling Time (h) | Matrix                   | N1   | N2   | N3   | Mean | SD   |
|-------------------|--------------------------|------|------|------|------|------|
| 0.5               | Blood                    | 1150 | 2790 | 2690 | 2210 | 919  |
|                   | Brain                    | 223  | 1180 | 1150 | 851  | 544  |
|                   | <b>Brain/Blood Ratio</b> | 0.19 | 0.42 | 0.43 | 0.35 | 0.13 |

|   |                          |       |       |       |    |    |
|---|--------------------------|-------|-------|-------|----|----|
| 4 | Blood                    | 53    | 24    | 82    | 53 | 29 |
|   | Brain                    | <LLOQ | <LLOQ | <LLOQ | -  | -  |
|   | <b>Brain/Blood Ratio</b> | -     | -     | -     | -  | -  |

**Table S8.** Blood and brain levels of **20g**, after IP administration of 10 mg/kg single dose (target dose) to female NMRI mice (n=3).

| Sampling Time (h) | Matrix                   | N1   | N2   | N3  | Mean | SD   |
|-------------------|--------------------------|------|------|-----|------|------|
| 0.5               | Blood                    | 1360 | 1110 | 360 | 943  | 520  |
|                   | Brain                    | 1900 | 1120 | 292 | 1104 | 804  |
|                   | <b>Brain/Blood Ratio</b> | 1.4  | 1.0  | 0.8 | 1.1  | 0.30 |
| 4                 | Blood                    | 63   | 160  | 81  | 101  | 52   |
|                   | Brain                    | 42   | 258  | 94  | 130  | 113  |
|                   | <b>Brain/Blood Ratio</b> | 0.67 | 1.6  | 1.2 | 1.1  | 0.47 |

**Table S9.** Percentage inhibition of **20g** against human kinase panel (Eurofins) at 1  $\mu$ M.

| ASSAY NAME           | Inhibition at 1 $\mu$ M (%) |
|----------------------|-----------------------------|
| Abl kinase (h)       | 11                          |
| Akt1/PKBalph (h)     | -26                         |
| AurA/Aur2 kinase (h) | 37                          |
| c-Met kinase (h)     | 11                          |
| CaMK2alpha (h)       | 3.7                         |
| CDC2/CDK1 (h) (cycB) | 100                         |
| CDK2 (h) (cycA)      | 100                         |
| CDK2 (h) (cycE)      | 98                          |
| CDK4 (h) (cycD3)     | 103.                        |
| CHK1 (h)             | -7.9                        |
| CHK2 (h)             | 2.6                         |
| EGFR kinase (h)      | -0.1                        |
| EphA2 kinase (h)     | 32                          |
| EphA3 kinase (h)     | 11                          |
| EphB4 kinase (h)     | 5.3                         |
| ERK2 (h) (P42mapk)   | 60                          |
| FGFR1 kinase (h)     | 8.1                         |
| FGFR2 kinase (h)     | 31                          |
| FGFR3 kinase (h)     | 30                          |
| GSK3beta (h)         | 94                          |
| HGK (h) (MAP4K4)     | 67                          |
| IKKalpha (h)         | 72                          |

|                            |         |
|----------------------------|---------|
| IRAK4 (h)                  | 51      |
| IRK (h) (InsR)             | -1.2    |
| JAK3 (h)                   | 73      |
| JNK1 (h)                   | 83      |
| KDR kinase (h)<br>(VEGFR2) | 67      |
| Lck kinase (h)             | 8.4     |
| MAPKAPK2 (h)               | -3.5    |
| MARK1 (h)                  | 9.3     |
| MNK2 (h)                   | 47      |
| NEK2 (h)                   | 11.7123 |
| p38alpha kinase (h)        | -41     |
| PAK2 (h)                   | 10      |
| PAK4 (h)                   | -0.11   |
| PDK1 (h)                   | 6.6     |
| Pim2 kinase (h)            | 19      |
| PKA (h)                    | 9.4     |
| PKCbeta 2 (h)              | 4.9     |
| PLK1 (h)                   | 5.3     |
| RAF-1 kinase (h)           | 52      |
| ROCK1 (h)                  | 1.8     |
| SGK1 (h)                   | 8.3     |
| SIK (h)                    | 22      |
| Src kinase (h)             | 19      |
| TAOK2 (TAO1) (h)           | 86      |
| TRKA (h)                   | 5.3     |

**Table S10.** Parasitemia levels (measured as parasites per milliliter) of *T. b. brucei* STIB795 from efficacy study of **20g** dosed at 10 mg/kg/day during 5-day treatment of mice.

| Mouse | Infection         | Treatment           |                       |                     |                     |                       | Post Treatment |
|-------|-------------------|---------------------|-----------------------|---------------------|---------------------|-----------------------|----------------|
|       | Day 0             | Day 3               | Day 4                 | Day 5               | Day 6               | Day 7                 | Day 8          |
| 1     | 1×10 <sup>4</sup> | 9.5×10 <sup>6</sup> | 2.1×10 <sup>7</sup>   | 5.6×10 <sup>4</sup> | ND <sup>a</sup>     |                       |                |
| 2     | 1×10 <sup>4</sup> | 9.0×10 <sup>6</sup> | 1.2×10 <sup>7</sup>   | ND                  | ND <sup>a</sup>     |                       |                |
| 3     | 1×10 <sup>4</sup> | 1.4×10 <sup>7</sup> | 4.0×10 <sup>7</sup>   | 1.1×10 <sup>5</sup> | ND                  | ND                    | a              |
| 4     | 1×10 <sup>4</sup> | 7.5×10 <sup>6</sup> | 1.4×10 <sup>8</sup>   | 1.4×10 <sup>9</sup> | a                   |                       |                |
| 5     | 1×10 <sup>4</sup> | 1.3×10 <sup>7</sup> | 5.6×10 <sup>4</sup> a |                     |                     |                       |                |
| 6     | 1×10 <sup>4</sup> | 2.0×10 <sup>6</sup> | 2.7×10 <sup>7</sup>   | 4.5×10 <sup>7</sup> | 3.2×10 <sup>8</sup> | 7.3×10 <sup>8</sup> a |                |

ND = Not Detected (parasitemia levels < 5.6×10<sup>4</sup> p/mL).



<sup>a</sup>Dead

**Table S11.** Measured activity of compounds against *Trypanosoma cruzi*, and *Leishmania donovani* as well as L6 and THP-1.

| Cpd        | <i>T. cruzi</i> pEC <sub>50</sub> | <i>L. donovani</i> pEC <sub>50</sub> | L6 pTC <sub>50</sub> | THP-1 pTC <sub>50</sub> |
|------------|-----------------------------------|--------------------------------------|----------------------|-------------------------|
| <b>1</b>   | <i>nt</i>                         | <i>nt</i>                            | > 6.2 ± 0.00         | > 6.7 ± 0.00            |
| <b>10e</b> | > 9.0 ± 0.00                      | <i>nt</i>                            | > 6.2 ± 0.00         | > 6.7 ± 0.00            |
| <b>10i</b> | <i>nt</i>                         | <i>nt</i>                            | > 6.2 ± 0.00         | > 6.7 ± 0.00            |
| <b>20m</b> | 5.3 ± 0.11                        | <i>nt</i>                            | <i>nt</i>            | 4.7 ± 0.031             |
| <b>20a</b> | < 5.0 ± 0.00                      | < 5.0 ± 0.00                         | <i>nt</i>            | 4.6 ± 0.00              |
| <b>20l</b> | < 5.0 ± 0.00                      | <i>nt</i>                            | <i>nt</i>            | 5.7 ± 0.06              |
| <b>10b</b> | < 4.7 ± 0.00                      | < 5.3 ± 0.00                         | < 4.8 ± 0.00         | 4.7 ± 0.01              |
| <b>10s</b> | 5.2 ± 0.055                       | < 5.3 ± 0.00                         | < 5.3 ± 0.00         | 4.9 ± 0.03              |
| <b>S1h</b> | < 4.7 ± 0.00                      | < 5.3 ± 0.00                         | < 4.3 ± 0.00         | 4.3 ± 0.00              |
| <b>10d</b> | 4.7 ± 0.00                        | < 5.3 ± 0.00                         | < 4.3 ± 0.00         | 4.3 ± 0.01              |
| <b>10a</b> | < 4.7 ± 0.00                      | < 5.7 ± 0.00                         | <i>nt</i>            | 4.7 ± 0.03              |
| <b>S1i</b> | <i>nt</i>                         | <i>nt</i>                            | 5.2 ± 0.055          | > 5.5 ± 0.00            |
| <b>S1k</b> | < 4.7 ± 0.00                      | < 5.3 ± 0.00                         | < 4.3 ± 0.00         | < 4.3 ± 0.00            |
| <b>S1g</b> | < 4.7 ± 0.00                      | < 5.3 ± 0.00                         | <i>nt</i>            | < 4.3 ± 0.00            |
| <b>S2a</b> | < 4.7 ± 0.00                      | < 5.3 ± 0.00                         | <i>nt</i>            | < 4.3 ± 0.00            |
| <b>S1c</b> | 5.1 ± 0.10                        | < 5.3 ± 0.00                         | < 4.8 ± 0.00         | < 4.3 ± 0.00            |
| <b>S1e</b> | < 4.7 ± 0.00                      | < 5.3 ± 0.00                         | < 4.3 ± 0.00         | < 4.3 ± 0.00            |
| <b>S1f</b> | < 4.7 ± 0.00                      | < 5.3 ± 0.00                         | < 4.3 ± 0.00         | < 4.3 ± 0.00            |
| <b>10g</b> | 5.1 ± 0.035                       | < 6.3 ± 0.00                         | 5.5 ± 0.033          | 5.1 ± 0.07              |
| <b>S1d</b> | < 4.7 ± 0.00                      | < 5.3 ± 0.00                         | <i>nt</i>            | < 4.6 ± 0.00            |
| <b>S1j</b> | < 4.7 ± 0.00                      | < 5.3 ± 0.00                         | <i>nt</i>            | < 4.3 ± 0.00            |
| <b>10f</b> | < 4.7 ± 0.00                      | 5.7 ± 0.032                          | 4.6 ± 0.094          | 4.9 ± 0.02              |
| <b>12c</b> | < 4.7 ± 0.00                      | < 6.3 ± 0.00                         | 5.4 ± 0.091          | 5.3 ± 0.07              |
| <b>12d</b> | < 4.7 ± 0.00                      | < 5.3 ± 0.00                         | 4.3 ± 0.009          | > 6.2 ± 0.00            |
| <b>S1b</b> | 5.6 ± 0.045                       | 5.8 ± 0.20                           | 4.3 ± 0.082          | < 4.3 ± 0.00            |
| <b>12b</b> | 5.8 ± 0.034                       | < 5.3 ± 0.00                         | 5.5 ± 0.011          | 5.8 ± 0.11              |
| <b>12a</b> | 5.0 ± 0.008                       | < 5.3 ± 0.00                         | 4.5 ± 0.043          | 4.8 ± 0.06              |
| <b>S1a</b> | 5.8 ± 0.063                       | 6.1 ± 0.19                           | < 4.3 ± 0.00         | < 4.3 ± 0.00            |
| <b>21a</b> | 5.4 ± 0.026                       | 5.9 ± 0.20                           | < 4.9 ± 0.00         | < 4.9 ± 0.00            |
| <b>22a</b> | 5.5 ± 0.015                       | < 5.3 ± 0.00                         | 5.2 ± 0.079          | < 5.3 ± 0.00            |
| <b>22b</b> | < 4.7 ± 0.00                      | < 5.3 ± 0.00                         | 5.4 ± 0.099          | 5.3 ± 0.003             |
| <b>22c</b> | 6.1 ± 0.013                       | <i>nt</i>                            | > 6.0 ± 0.00         | 6.1 ± 0.004             |
| <b>20r</b> | 6.4 ± 0.027                       | <i>nt</i>                            | > 6.2 ± 0.068        | 6.2 ± 0.011             |
| <b>20c</b> | 7.2 ± 0.081                       | <i>nt</i>                            | > 6.2 ± 0.00         | > 6.2 ± 0.00            |
| <b>20p</b> | 5.6 ± 0.071                       | < 5.7 ± 0.00                         | 5.5 ± 0.038          | 5.4 ± 0.12              |
| <b>10h</b> | <i>Nt</i>                         | <i>nt</i>                            | > 6.2 ± 0.00         | > 6.2 ± 0.00            |
| <b>23j</b> | 5.0 ± 0.014                       | < 6.3 ± 0.00                         | 5.0 ± 0.075          | 5.1 ± 0.035             |
| <b>22d</b> | < 4.7 ± 0.00                      | < 5.6 ± 0.00                         | < 4.3 ± 0.00         | < 4.6 ± 0.00            |
| <b>21d</b> | < 4.7 ± 0.00                      | < 5.3 ± 0.00                         | < 4.3 ± 0.00         | < 4.3 ± 0.00            |
| <b>18c</b> | < 4.7 ± 0.00                      | < 5.3 ± 0.00                         | 4.4 ± 0.015          | 4.5 ± 0.19              |
| <b>18a</b> | < 4.7 ± 0.00                      | < 5.3 ± 0.00                         | < 4.3 ± 0.015        | < 4.3 ± 0.00            |
| <b>16a</b> | < 4.7 ± 0.00                      | < 5.3 ± 0.00                         | < 4.3 ± 0.00         | < 4.3 ± 0.00            |

|            |              |              |              |              |
|------------|--------------|--------------|--------------|--------------|
| <b>21e</b> | 5.0 ± 0.009  | <i>nt</i>    | 4.9 ± 0.034  | < 4.3 ± 0.00 |
| <b>21f</b> | < 4.7 ± 0.00 | <i>nt</i>    | <i>nt</i>    | < 4.3 ± 0.00 |
| <b>20g</b> | <i>nt</i>    | <i>nt</i>    | > 6.2 ± 0.00 | > 6.2 ± 0.00 |
| <b>21g</b> | 5.1 ± 0.020  | <i>nt</i>    | 4.7 ± 0.025  | 4.3 ± 0.043  |
| <b>21h</b> | 5.6 ± 0.061  | <i>nt</i>    | 4.9 ± 0.024  | < 4.3 ± 0.00 |
| <b>20q</b> | <i>nt</i>    | < 5.3 ± 0.00 | 5.3 ± 0.085  | 6.1 ± 0.01   |
| <b>23b</b> | < 4.7 ± 0.00 | < 5.3 ± 0.00 | <i>nt</i>    | < 4.3 ± 0.00 |
| <b>18d</b> | 6.0 ± 0.028  | < 5.3 ± 0.00 | 5.7 ± 0.29   | 5.7 ± 0.06   |
| <b>23a</b> | < 4.7 ± 0.00 | <i>nt</i>    | < 4.3 ± 0.00 | < 4.3 ± 0.00 |
| <b>10n</b> | < 4.7 ± 0.00 | <i>nt</i>    | 4.3 ± 0.00   | < 4.3 ± 0.00 |
| <b>20d</b> | <i>nt</i>    | <i>nt</i>    | 6.2 ± 0.13   | > 6.2 ± 0.00 |
| <b>20e</b> | 6.3 ± 0.047  | <i>nt</i>    | > 6.2 ± 0.00 | > 6.2 ± 0.00 |
| <b>20h</b> | < 4.8 ± 0.00 | < 5.4 ± 0.00 | < 4.4 ± 0.00 | < 4.4 ± 0.00 |
| <b>20n</b> | 4.8 ± 0.020  | < 5.3 ± 0.00 | 5.0 ± 0.046  | 5.4 ± 0.07   |
| <b>20o</b> | 4.7 ± 0.00   | < 5.3 ± 0.00 | 4.6 ± 0.031  | 5.1 ± 0.03   |
| <b>20f</b> | 5.4 ± 0.015  | < 5.3 ± 0.00 | 5.4 ± 0.055  | 5.6 ± 0.03   |
| <b>18b</b> | < 4.7 ± 0.00 | < 5.3 ± 0.00 | < 4.3 ± 0.00 | < 4.3 ± 0.00 |
| <b>23h</b> | 5.4 ± 0.015  | <i>nt</i>    | 4.4 ± 0.038  | < 4.3 ± 0.00 |
| <b>23d</b> | 5.5 ± 0.039  | <i>nt</i>    | 4.5 ± 0.029  | < 4.3 ± 0.00 |
| <b>23i</b> | 5.6 ± 0.20   | <i>nt</i>    | 5.1 ± 0.045  | <i>nt</i>    |
| <b>23c</b> | 5.4 ± 0.045  | < 5.3 ± 0.00 | 4.7 ± 0.041  | < 4.3 ± 0.00 |
| <b>17</b>  | 4.9 ± 0.038  | < 5.3 ± 0.00 | 4.6 ± 0.016  | < 4.3 ± 0.00 |
| <b>20k</b> | 6.9 ± 0.014  | <i>nt</i>    | > 6.2 ± 0.00 | > 6.2 ± 0.00 |
| <b>19a</b> | < 4.7 ± 0.00 | <i>nt</i>    | < 4.3 ± 0.00 | < 4.3 ± 0.00 |
| <b>19b</b> | <i>nt</i>    | <i>nt</i>    | > 6.2 ± 0.00 | > 6.2 ± 0.00 |
| <b>20i</b> | 6.4 ± 0.051  | <i>nt</i>    | < 5.6 ± 0.00 | 6.2 ± 0.14   |
| <b>20j</b> | < 4.7 ± 0.00 | <i>nt</i>    | < 4.3 ± 0.00 | < 4.3 ± 0.00 |
| <b>23f</b> | < 4.7 ± 0.00 | <i>nt</i>    | < 4.3 ± 0.00 | < 4.3 ± 0.00 |
| <b>23e</b> | 5.3 ± 0.029  | <i>nt</i>    | < 4.3 ± 0.00 | 4.8 ± 0.14   |
| <b>23k</b> | 5.4 ± 0.023  | <i>nt</i>    | 4.5 ± 0.019  | 4.9 ± 0.10   |
| <b>23l</b> | 4.9 ± 0.026  | <i>nt</i>    | < 4.3 ± 0.00 | < 4.3 ± 0.00 |
| <b>23g</b> | < 4.7 ± 0.00 | <i>nt</i>    | < 4.3 ± 0.00 | < 4.3 ± 0.00 |
| <b>23m</b> | < 4.7 ± 0.00 | <i>nt</i>    | < 4.3 ± 0.00 | < 4.3 ± 0.00 |

*nt* = not tested

**Table S.12.** Measured severity score of compounds (10  $\mu$ M) against adult *Schistosoma mansoni* at the indicated time points. Compounds were scored based on the non-mutually exclusive phenotypic responses of the parasite that involved changes in translucency, motility and ability to adhere to the substratum. Each response was awarded a score of 1 and added up to the maximum score of 4. Degeneracy or damage to the outer surface of the worm was scored as 4. The anthelmintic, niclosamide, which causes degeneracy, tegumental (surface) damage and eventually death, was used as a positive control.

| <b>ID</b>                                     | <b>3 h</b> | <b>6 h</b> | <b>24 h</b> | <b>48 h</b> |
|-----------------------------------------------|------------|------------|-------------|-------------|
| <b>1</b>                                      | 0          | 0          | 0           | 0           |
| <b>10i</b>                                    | 0          | 0          | 0           | 2           |
| <b>10b</b>                                    | 0          | 0          | 0           | 0           |
| <b>10s</b>                                    | 2          | 2          | 2           | 2           |
| <b>S1h</b>                                    | 0          | 0          | 0           | 0           |
| <b>S1i</b>                                    | 0          | 0          | 0           | 0           |
| <b>S1k</b>                                    | 2          | 2          | 2           | 2           |
| <b>S1g</b>                                    | 0          | 0          | 0           | 0           |
| <b>20r</b>                                    | 1          | 1          | 0           | 0           |
| <b>21e</b>                                    | 0          | 0          | 0           | 0           |
| <b>21f</b>                                    | 1          | 0          | 0           | 0           |
| <b>Niclosamide<br/>(positive<br/>control)</b> | 4          | 4          | 4           | 4           |

**Table S.13.** SEM measurements for *T. b. brucei* and MRC5 activity.

| <b>ID</b>  | <b><i>T. b. brucei</i> pEC<sub>50</sub></b> | <b>MRC5 pTC<sub>50</sub></b> |
|------------|---------------------------------------------|------------------------------|
| <b>10a</b> | 5.2 $\pm$ 0.08                              | < 4.3 $\pm$ 0.00             |
| <b>10b</b> | 4.8 $\pm$ 0.01                              | < 4.3 $\pm$ 0.00             |
| <b>10c</b> | 6.4 $\pm$ 0.11                              | <i>nt</i>                    |
| <b>10d</b> | 6.4 $\pm$ 0.09                              | <i>nt</i>                    |
| <b>10e</b> | 7.4 $\pm$ 0.07                              | < 4.3 $\pm$ 0.00             |
| <b>10f</b> | 5.3 $\pm$ 0.07                              | < 4.3 $\pm$ 0.00             |
| <b>10g</b> | 5.7 $\pm$ 0.02                              | < 4.3 $\pm$ 0.00             |
| <b>1</b>   | 8.2 $\pm$ 0.02                              | < 4.3 $\pm$ 0.00             |
| <b>10h</b> | 8.2 $\pm$ 0.03                              | <i>nt</i>                    |
| <b>10i</b> | 7.6 $\pm$ 0.07                              | <i>nt</i>                    |
| <b>10j</b> | 5.7 $\pm$ 0.11                              | <i>nt</i>                    |
| <b>10k</b> | 7.2 $\pm$ 0.01                              | <i>nt</i>                    |
| <b>10l</b> | 6.1 $\pm$ 0.1                               | <i>nt</i>                    |
| <b>10m</b> | 6.8 $\pm$ 0.06                              | <i>nt</i>                    |
| <b>10n</b> | 6.1 $\pm$ 0.07                              | <i>nt</i>                    |
| <b>10o</b> | 7.2 $\pm$ 0.05                              | <i>nt</i>                    |
| <b>10p</b> | 5.8 $\pm$ 0.13                              | <i>nt</i>                    |
| <b>10q</b> | 6.0 $\pm$ 0.17                              | <i>nt</i>                    |

|            |                  |                  |
|------------|------------------|------------------|
| <b>10r</b> | $7.8 \pm 0.06$   | <i>nt</i>        |
| <b>10s</b> | $6.2 \pm 0.08$   | $5.7 \pm 0.17$   |
| <b>10t</b> | $5.6 \pm 0.08$   | <i>nt</i>        |
| <b>9</b>   | $6.7 \pm 0.01$   | <i>nt</i>        |
| <b>12a</b> | $6.0 \pm 0.02$   | $< 4.3 \pm 0.00$ |
| <b>12b</b> | $6.6 \pm 0.02$   | $< 4.3 \pm 0.00$ |
| <b>12c</b> | $6.6 \pm 0.05$   | $< 4.3 \pm 0.00$ |
| <b>12d</b> | $7.0 \pm 0.02$   | $< 4.3 \pm 0.00$ |
| <b>16a</b> | $< 4.4 \pm 0.00$ | $< 4.3 \pm 0.00$ |
| <b>17</b>  | $5.4 \pm 0.04$   | $4.7 \pm 0.02$   |
| <b>18a</b> | $< 4.4 \pm 0.00$ | $< 4.3 \pm 0.00$ |
| <b>18b</b> | $6.2 \pm 0.02$   | $< 4.3 \pm 0.00$ |
| <b>18c</b> | $< 4.4 \pm 0.00$ | $< 4.3 \pm 0.00$ |
| <b>18d</b> | $6.6 \pm 0.08$   | $< 4.3 \pm 0.00$ |
| <b>19a</b> | $< 4.4 \pm 0.00$ | $< 4.3 \pm 0.00$ |
| <b>19b</b> | $7.0 \pm 0.09$   | $< 4.3 \pm 0.00$ |
| <b>20a</b> | $< 4.7 \pm 0.00$ | $< 4.3 \pm 0.00$ |
| <b>20b</b> | $5.9 \pm 0.10$   | $< 4.6 \pm 0.00$ |
| <b>20c</b> | $7.6 \pm 0.09$   | $< 4.3 \pm 0.00$ |
| <b>20d</b> | $7.2 \pm 0.05$   | $< 4.3 \pm 0.00$ |
| <b>20e</b> | $7.3 \pm 0.01$   | $< 4.3 \pm 0.00$ |
| <b>20f</b> | $6.0 \pm 0.02$   | $< 4.3 \pm 0.00$ |
| <b>20g</b> | $7.7 \pm 0.05$   | $< 4.3 \pm 0.00$ |
| <b>20h</b> | $5.3 \pm 0.01$   | $< 4.4 \pm 0.00$ |
| <b>20i</b> | $7.0 \pm 0.05$   | $< 4.6 \pm 0.00$ |
| <b>20j</b> | $5.2 \pm 0.13$   | $< 4.3 \pm 0.00$ |
| <b>20k</b> | $7.7 \pm 0.02$   | $< 4.3 \pm 0.00$ |
| <b>20l</b> | $5.9 \pm 0.14$   | $< 4.3 \pm 0.00$ |
| <b>20m</b> | $5.3 \pm 0.17$   | $< 4.3 \pm 0.00$ |
| <b>20n</b> | $4.8 \pm 0.05$   | $< 4.3 \pm 0.00$ |
| <b>20o</b> | $5.3 \pm 0.03$   | $< 4.3 \pm 0.00$ |
| <b>20p</b> | $6.3 \pm 0.11$   | $< 4.3 \pm 0.00$ |
| <b>20q</b> | $6.8 \pm 0.02$   | $< 4.3 \pm 0.00$ |
| <b>20r</b> | $6.8 \pm 0.06$   | $< 4.3 \pm 0.00$ |
| <b>21a</b> | $5.9 \pm 0.01$   | $< 4.9 \pm 0.00$ |
| <b>21b</b> | $6.2 \pm 0.08$   | $< 4.3 \pm 0.00$ |
| <b>21c</b> | $4.9 \pm 0.04$   | $< 4.3 \pm 0.00$ |
| <b>21d</b> | $6.5 \pm 0.05$   | $< 4.3 \pm 0.00$ |
| <b>21e</b> | $6.2 \pm 0.07$   | $< 4.3 \pm 0.00$ |
| <b>21f</b> | $6.1 \pm 0.07$   | $< 4.3 \pm 0.00$ |
| <b>21g</b> | $6.2 \pm 0.04$   | $4.5 \pm 0.03$   |
| <b>21h</b> | $6.7 \pm 0.05$   | $< 4.3 \pm 0.00$ |
| <b>22a</b> | $7.5 \pm 0.08$   | $< 4.3 \pm 0.00$ |
| <b>22b</b> | $7.7 \pm 0.06$   | $< 4.3 \pm 0.00$ |
| <b>22c</b> | $8.3 \pm 0.13$   | $< 4.6 \pm 0.00$ |
| <b>22d</b> | $7.1 \pm 0.03$   | $< 4.3 \pm 0.00$ |
| <b>23a</b> | $7.2 \pm 0.06$   | $< 4.3 \pm 0.00$ |
| <b>23b</b> | $6.8 \pm 0.01$   | $< 4.3 \pm 0.00$ |
| <b>23c</b> | $7.1 \pm 0.10$   | $< 4.3 \pm 0.00$ |

|            |            |              |
|------------|------------|--------------|
| <b>23d</b> | 6.8 ± 0.13 | < 4.3 ± 0.00 |
| <b>23e</b> | 7.2 ± 0.04 | < 4.3 ± 0.00 |
| <b>23f</b> | 6.6 ± 0.03 | < 4.3 ± 0.00 |
| <b>23g</b> | 7.2 ± 0.05 | < 4.3 ± 0.00 |
| <b>23h</b> | 6.8 ± 0.03 | < 4.3 ± 0.00 |
| <b>23i</b> | 7.9 ± 0.08 | < 4.3 ± 0.00 |
| <b>23j</b> | 6.8 ± 0.07 | < 4.3 ± 0.00 |
| <b>23k</b> | 6.3 ± 0.04 | < 4.3 ± 0.00 |
| <b>23l</b> | 6.3 ± 0.04 | < 4.3 ± 0.00 |
| <b>23m</b> | 5.3 ± 0.03 | < 4.3 ± 0.00 |

nt = not tested.

**Table S14.** HPLC trace of key compounds.

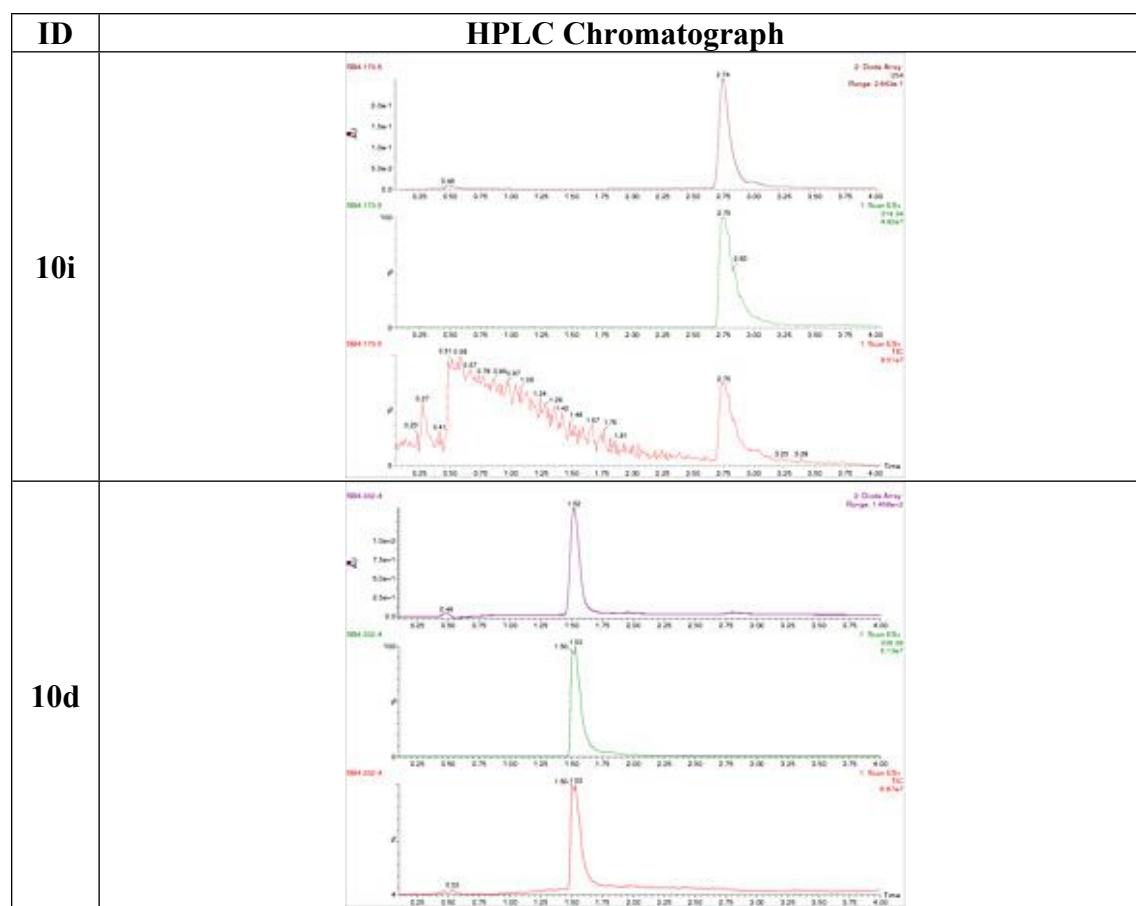

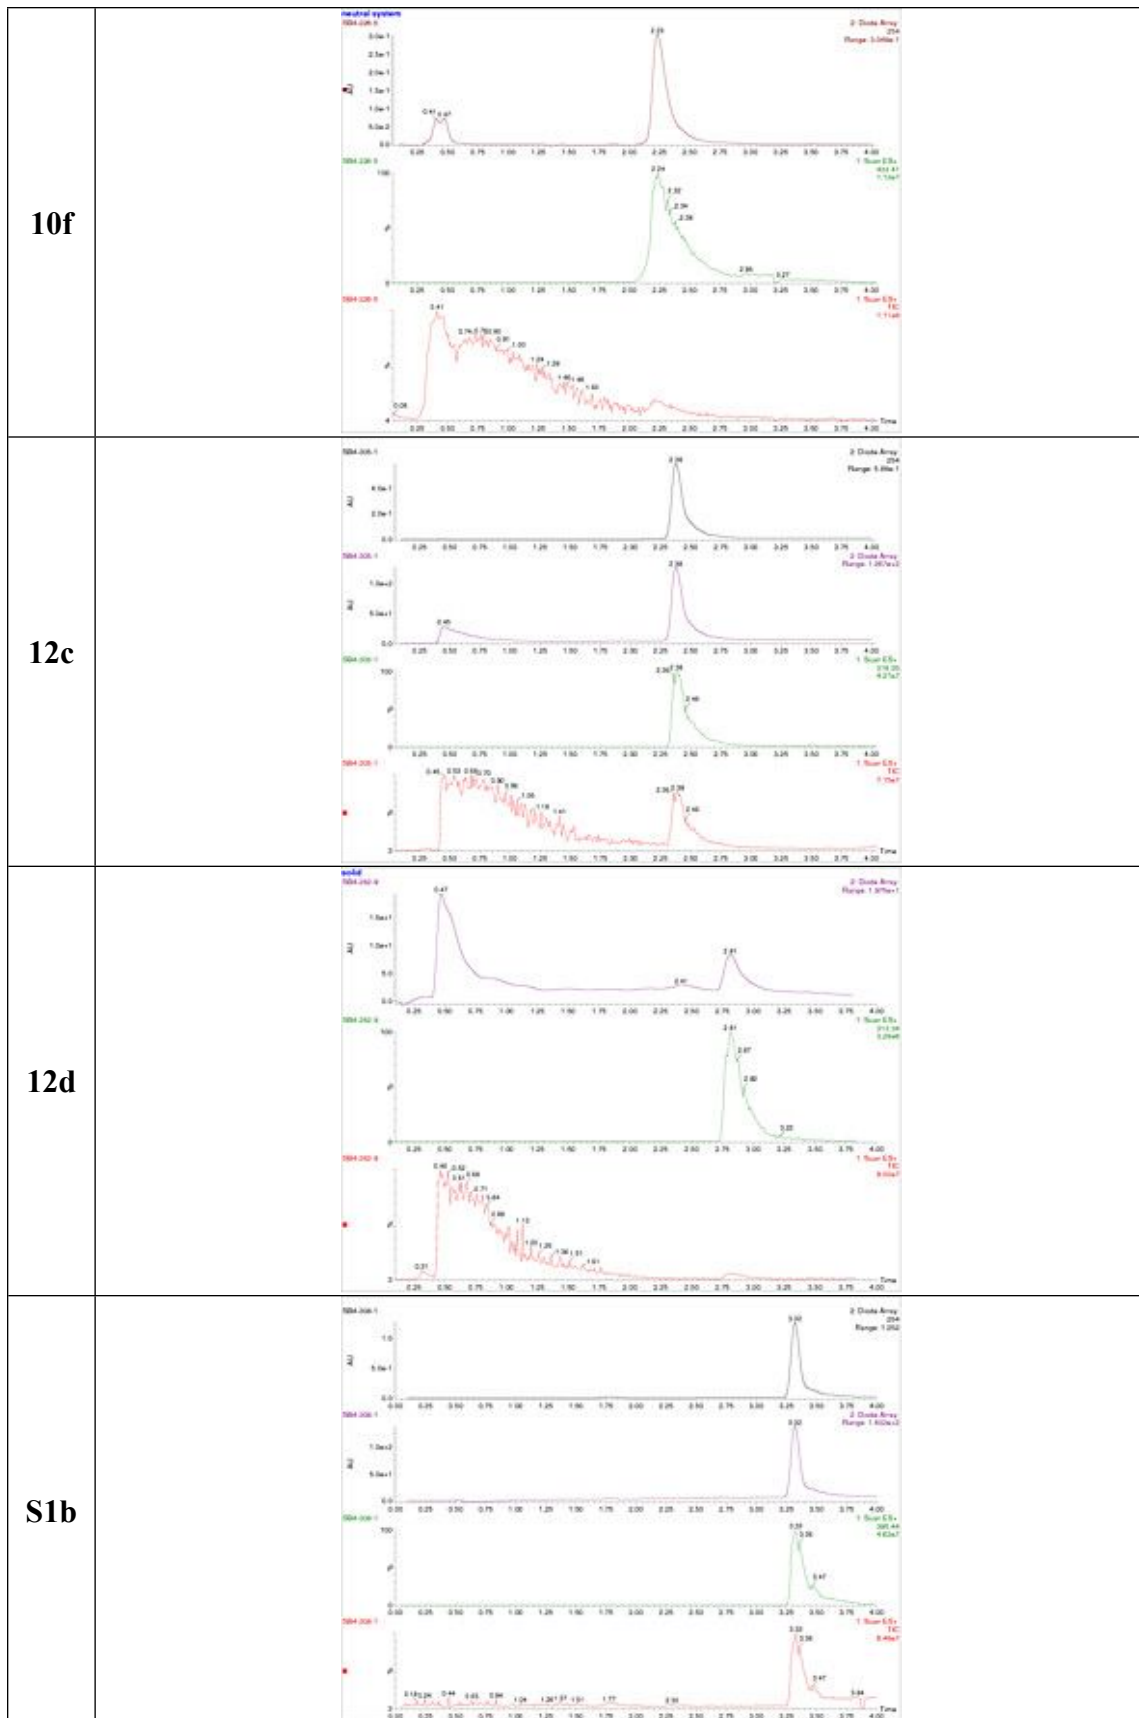

|                   |  |
|-------------------|--|
| <p><b>12b</b></p> |  |
| <p><b>12a</b></p> |  |
| <p><b>S1a</b></p> |  |
| <p><b>21a</b></p> |  |

|     |  |
|-----|--|
| 22a |  |
| 21f |  |
| 22c |  |
| 20r |  |





|                   |                                                                                                                                                                                                      |
|-------------------|------------------------------------------------------------------------------------------------------------------------------------------------------------------------------------------------------|
| <p><b>22d</b></p> | <p>Chromatograms for sample 22d. The top plot (green) shows a large peak at 0.50 and a smaller peak at 3.12. The bottom plot (red) shows a series of peaks from 0.48 to 1.90 and a peak at 3.12.</p> |
| <p><b>21d</b></p> | <p>Chromatograms for sample 21d. The top plot (green) shows a peak at 0.50 and a large peak at 2.60. The bottom plot (red) shows a peak at 0.48 and a large peak at 2.60.</p>                        |
| <p><b>18c</b></p> | <p>Chromatograms for sample 18c. The top plot (green) shows a peak at 1.80. The bottom plot (red) shows peaks at 0.47, 0.71, 0.75, and 0.78, and a large peak at 1.80.</p>                           |
| <p><b>18a</b></p> | <p>Chromatograms for sample 18a. The top plot (green) shows a peak at 1.80. The bottom plot (red) shows peaks at 0.48, 0.51, 1.80, and 3.41.</p>                                                     |

|     |  |
|-----|--|
| 16a |  |
| 21e |  |
| 21f |  |
| 20g |  |

|                   |                                                                                                                                                                                                                                                                                                                                                                                                                                                                                     |
|-------------------|-------------------------------------------------------------------------------------------------------------------------------------------------------------------------------------------------------------------------------------------------------------------------------------------------------------------------------------------------------------------------------------------------------------------------------------------------------------------------------------|
| <p><b>21g</b></p> | <p>WT 21000.0<br/>     0.50 3.30<br/>     5.0e+1<br/>     4.0e+1<br/>     3.0e+1<br/>     2.0e+1<br/>     1.0e+1<br/>     0.0<br/>     0.25 0.50 0.75 1.00 1.25 1.50 1.75 2.00 2.25 2.50 2.75 3.00 3.25 3.50 3.75 4.00<br/>     Time</p> <p>WT 21000.0<br/>     0.50 3.30<br/>     5.0e+1<br/>     4.0e+1<br/>     3.0e+1<br/>     2.0e+1<br/>     1.0e+1<br/>     0.0<br/>     0.25 0.50 0.75 1.00 1.25 1.50 1.75 2.00 2.25 2.50 2.75 3.00 3.25 3.50 3.75 4.00<br/>     Time</p>   |
| <p><b>21h</b></p> | <p>WT 21000.11<br/>     0.50 3.30<br/>     5.0e+1<br/>     4.0e+1<br/>     3.0e+1<br/>     2.0e+1<br/>     1.0e+1<br/>     0.0<br/>     0.25 0.50 0.75 1.00 1.25 1.50 1.75 2.00 2.25 2.50 2.75 3.00 3.25 3.50 3.75 4.00<br/>     Time</p> <p>WT 21000.11<br/>     0.50 3.30<br/>     5.0e+1<br/>     4.0e+1<br/>     3.0e+1<br/>     2.0e+1<br/>     1.0e+1<br/>     0.0<br/>     0.25 0.50 0.75 1.00 1.25 1.50 1.75 2.00 2.25 2.50 2.75 3.00 3.25 3.50 3.75 4.00<br/>     Time</p> |
| <p><b>20q</b></p> | <p>WT 20000.11<br/>     0.50 1.90<br/>     5.0e+1<br/>     4.0e+1<br/>     3.0e+1<br/>     2.0e+1<br/>     1.0e+1<br/>     0.0<br/>     0.25 0.50 0.75 1.00 1.25 1.50 1.75 2.00 2.25 2.50 2.75 3.00 3.25 3.50 3.75 4.00<br/>     Time</p> <p>WT 20000.11<br/>     0.50 1.90<br/>     5.0e+1<br/>     4.0e+1<br/>     3.0e+1<br/>     2.0e+1<br/>     1.0e+1<br/>     0.0<br/>     0.25 0.50 0.75 1.00 1.25 1.50 1.75 2.00 2.25 2.50 2.75 3.00 3.25 3.50 3.75 4.00<br/>     Time</p> |
| <p><b>23b</b></p> | <p>WT 23000.5<br/>     0.70 3.40<br/>     1.0e+2<br/>     8.0e+1<br/>     6.0e+1<br/>     4.0e+1<br/>     2.0e+1<br/>     0.0<br/>     0.25 0.50 0.75 1.00 1.25 1.50 1.75 2.00 2.25 2.50 2.75 3.00 3.25 3.50 3.75 4.00<br/>     Time</p> <p>WT 23000.5<br/>     0.70 3.40<br/>     1.0e+2<br/>     8.0e+1<br/>     6.0e+1<br/>     4.0e+1<br/>     2.0e+1<br/>     0.0<br/>     0.25 0.50 0.75 1.00 1.25 1.50 1.75 2.00 2.25 2.50 2.75 3.00 3.25 3.50 3.75 4.00<br/>     Time</p>   |

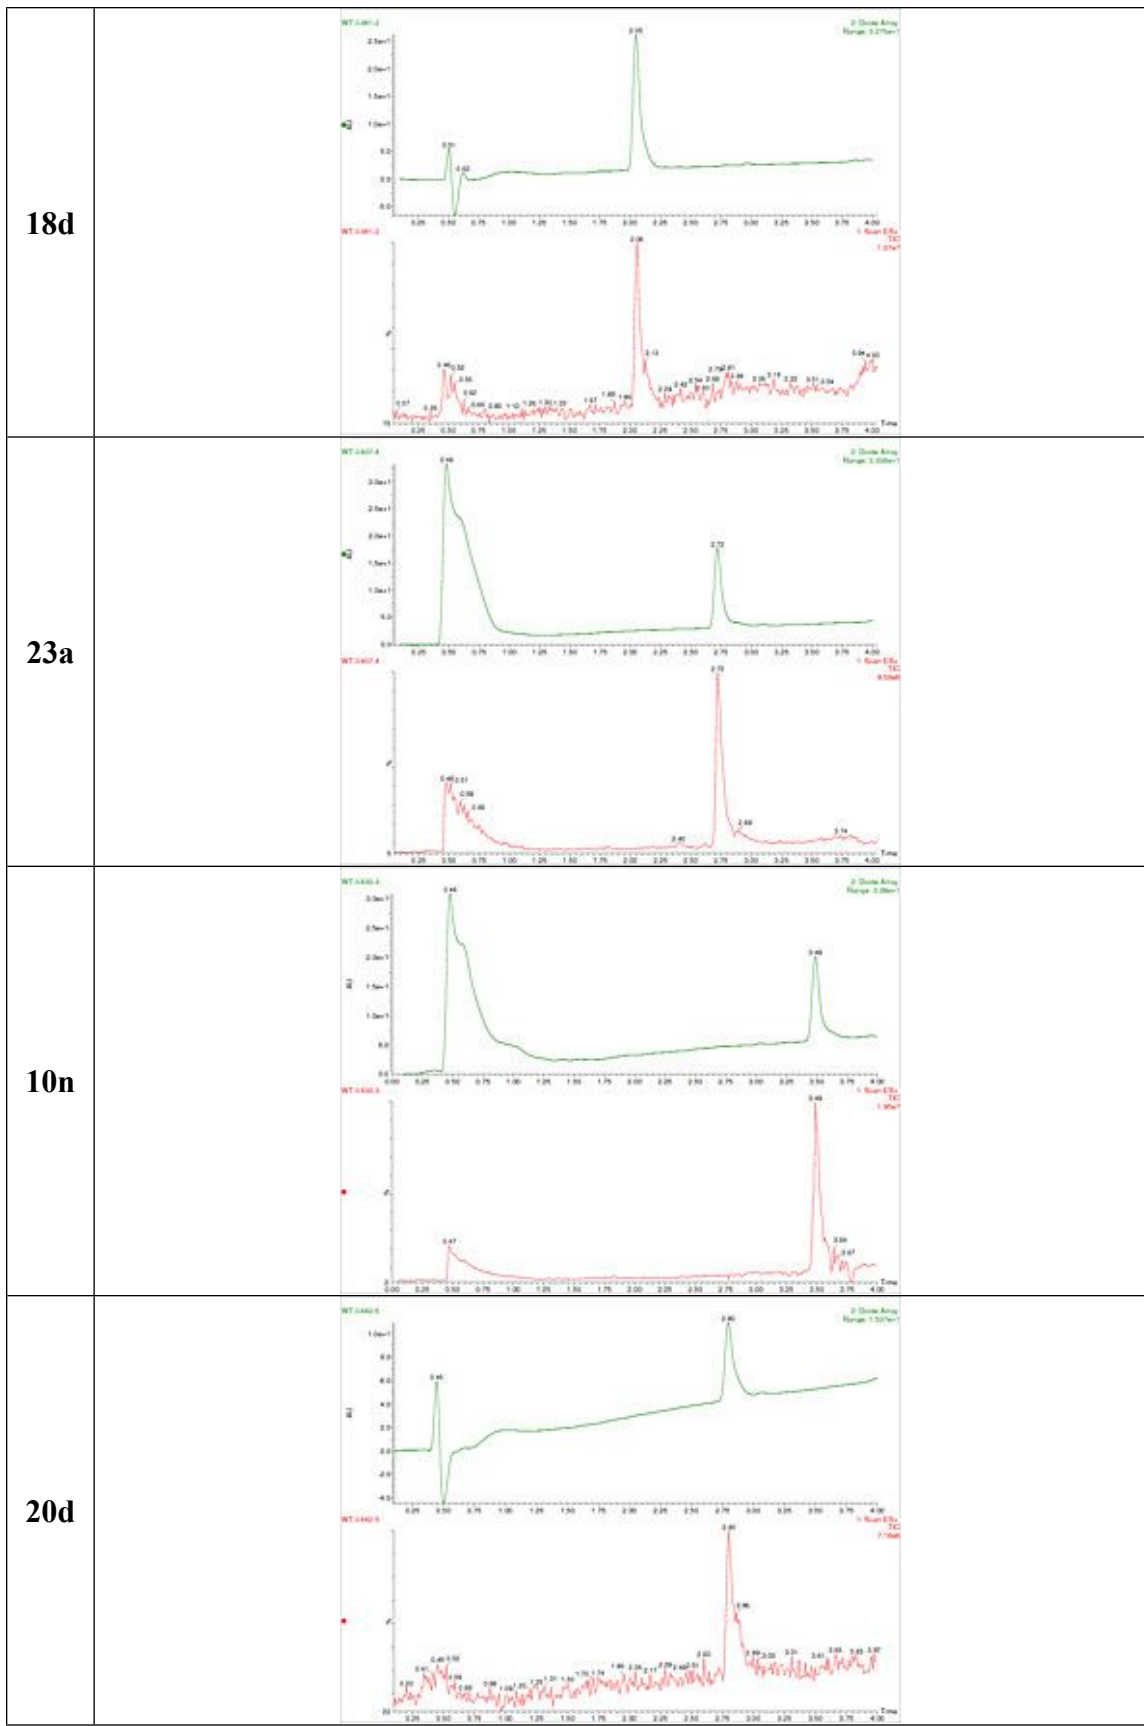

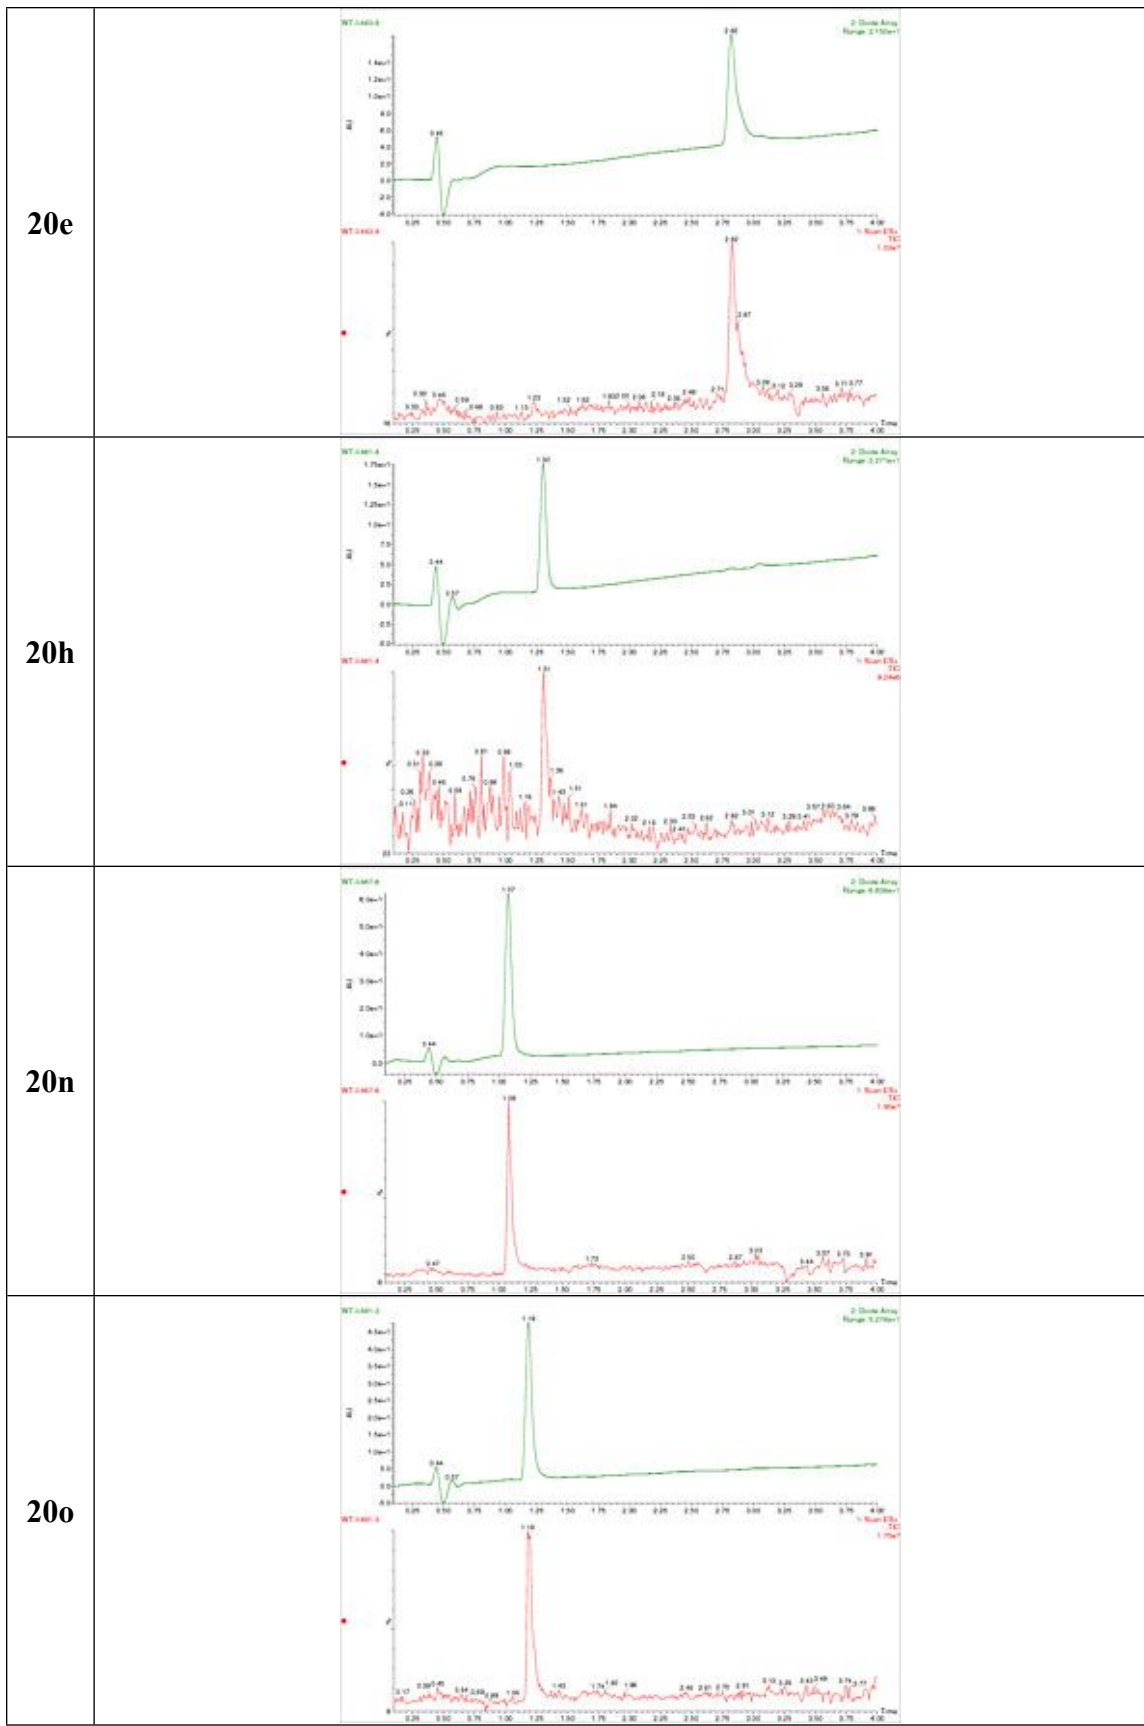

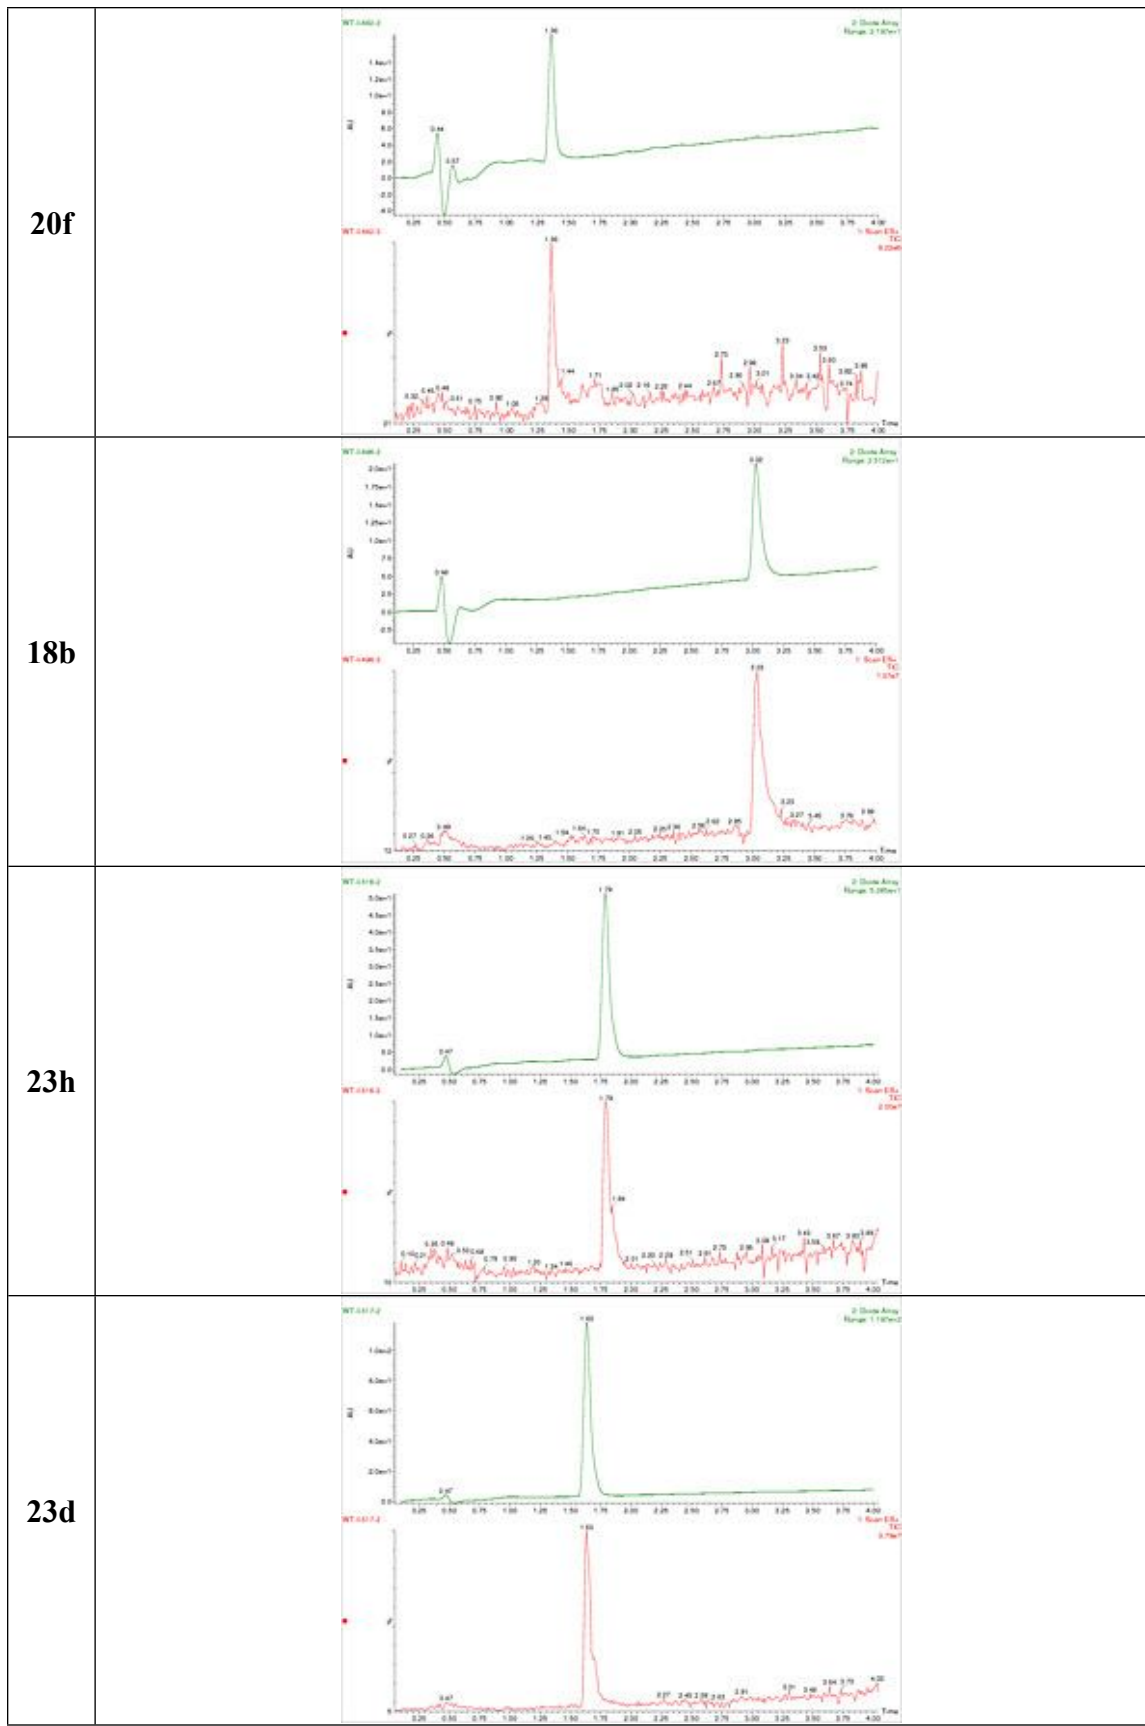

|     |  |
|-----|--|
| 23i |  |
| 23c |  |
| 17  |  |
| 20k |  |



|     |  |
|-----|--|
| 19a |  |
|-----|--|

|     |                                                                                                                                                                                                                                                                                                                                                                                                                                                                                                                                                                                                                                                                                                                                                                                                                                                                                |
|-----|--------------------------------------------------------------------------------------------------------------------------------------------------------------------------------------------------------------------------------------------------------------------------------------------------------------------------------------------------------------------------------------------------------------------------------------------------------------------------------------------------------------------------------------------------------------------------------------------------------------------------------------------------------------------------------------------------------------------------------------------------------------------------------------------------------------------------------------------------------------------------------|
| 23f | <p>WT 44763<br/>2<br/>4.0e+1<br/>3.5e+1<br/>3.0e+1<br/>2.5e+1<br/>2.0e+1<br/>1.5e+1<br/>1.0e+1<br/>5.0e+0<br/>0.0<br/>0.25 0.50 0.75 1.00 1.25 1.50 1.75 2.00 2.25 2.50 2.75 3.00 3.25 3.50 3.75 4.00<br/>Scan 6126e1<br/>1.44<br/>0.58</p> <p>WT 44763<br/>2<br/>4.0e+1<br/>3.5e+1<br/>3.0e+1<br/>2.5e+1<br/>2.0e+1<br/>1.5e+1<br/>1.0e+1<br/>5.0e+0<br/>0.0<br/>0.25 0.50 0.75 1.00 1.25 1.50 1.75 2.00 2.25 2.50 2.75 3.00 3.25 3.50 3.75 4.00<br/>Scan 6126e1<br/>1.40<br/>0.52 3.50</p>                                                                                                                                                                                                                                                                                                                                                                                   |
| 23e | <p>WT 44763<br/>2<br/>4.0e+1<br/>3.5e+1<br/>3.0e+1<br/>2.5e+1<br/>2.0e+1<br/>1.5e+1<br/>1.0e+1<br/>5.0e+0<br/>0.0<br/>0.25 0.50 0.75 1.00 1.25 1.50 1.75 2.00 2.25 2.50 2.75 3.00 3.25 3.50 3.75 4.00<br/>Scan 6127e1<br/>1.40<br/>0.58</p> <p>WT 44763<br/>2<br/>4.0e+1<br/>3.5e+1<br/>3.0e+1<br/>2.5e+1<br/>2.0e+1<br/>1.5e+1<br/>1.0e+1<br/>5.0e+0<br/>0.0<br/>0.25 0.50 0.75 1.00 1.25 1.50 1.75 2.00 2.25 2.50 2.75 3.00 3.25 3.50 3.75 4.00<br/>Scan 6127e1<br/>1.40<br/>0.25 0.30 0.35 0.40 0.45 0.50 0.55 0.60 0.65 0.70 0.75 0.80 0.85 0.90 0.95 1.00 1.05 1.10 1.15 1.20 1.25 1.30 1.35 1.40 1.45 1.50 1.55 1.60 1.65 1.70 1.75 1.80 1.85 1.90 1.95 2.00 2.05 2.10 2.15 2.20 2.25 2.30 2.35 2.40 2.45 2.50 2.55 2.60 2.65 2.70 2.75 2.80 2.85 2.90 2.95 3.00 3.05 3.10 3.15 3.20 3.25 3.30 3.35 3.40 3.45 3.50 3.55 3.60 3.65 3.70 3.75 3.80 3.85 3.90 3.95 4.00</p> |
| 23k | <p>WT 44863<br/>2<br/>4.0e+1<br/>3.5e+1<br/>3.0e+1<br/>2.5e+1<br/>2.0e+1<br/>1.5e+1<br/>1.0e+1<br/>5.0e+0<br/>0.0<br/>0.25 0.50 0.75 1.00 1.25 1.50 1.75 2.00 2.25 2.50 2.75 3.00 3.25 3.50 3.75 4.00<br/>Scan 4486e1<br/>1.40<br/>0.58</p> <p>WT 44863<br/>2<br/>4.0e+1<br/>3.5e+1<br/>3.0e+1<br/>2.5e+1<br/>2.0e+1<br/>1.5e+1<br/>1.0e+1<br/>5.0e+0<br/>0.0<br/>0.25 0.50 0.75 1.00 1.25 1.50 1.75 2.00 2.25 2.50 2.75 3.00 3.25 3.50 3.75 4.00<br/>Scan 4486e1<br/>1.40<br/>0.25 0.30 0.35 0.40 0.45 0.50 0.55 0.60 0.65 0.70 0.75 0.80 0.85 0.90 0.95 1.00 1.05 1.10 1.15 1.20 1.25 1.30 1.35 1.40 1.45 1.50 1.55 1.60 1.65 1.70 1.75 1.80 1.85 1.90 1.95 2.00 2.05 2.10 2.15 2.20 2.25 2.30 2.35 2.40 2.45 2.50 2.55 2.60 2.65 2.70 2.75 2.80 2.85 2.90 2.95 3.00 3.05 3.10 3.15 3.20 3.25 3.30 3.35 3.40 3.45 3.50 3.55 3.60 3.65 3.70 3.75 3.80 3.85 3.90 3.95 4.00</p> |
| 23l | <p>WT 44863<br/>2<br/>4.0e+1<br/>3.5e+1<br/>3.0e+1<br/>2.5e+1<br/>2.0e+1<br/>1.5e+1<br/>1.0e+1<br/>5.0e+0<br/>0.0<br/>0.25 0.50 0.75 1.00 1.25 1.50 1.75 2.00 2.25 2.50 2.75 3.00 3.25 3.50 3.75 4.00<br/>Scan 4486e1<br/>1.70<br/>0.58</p> <p>WT 44863<br/>2<br/>4.0e+1<br/>3.5e+1<br/>3.0e+1<br/>2.5e+1<br/>2.0e+1<br/>1.5e+1<br/>1.0e+1<br/>5.0e+0<br/>0.0<br/>0.25 0.50 0.75 1.00 1.25 1.50 1.75 2.00 2.25 2.50 2.75 3.00 3.25 3.50 3.75 4.00<br/>Scan 4486e1<br/>1.70<br/>0.25 0.30 0.35 0.40 0.45 0.50 0.55 0.60 0.65 0.70 0.75 0.80 0.85 0.90 0.95 1.00 1.05 1.10 1.15 1.20 1.25 1.30 1.35 1.40 1.45 1.50 1.55 1.60 1.65 1.70 1.75 1.80 1.85 1.90 1.95 2.00 2.05 2.10 2.15 2.20 2.25 2.30 2.35 2.40 2.45 2.50 2.55 2.60 2.65 2.70 2.75 2.80 2.85 2.90 2.95 3.00 3.05 3.10 3.15 3.20 3.25 3.30 3.35 3.40 3.45 3.50 3.55 3.60 3.65 3.70 3.75 3.80 3.85 3.90 3.95 4.00</p> |



20b

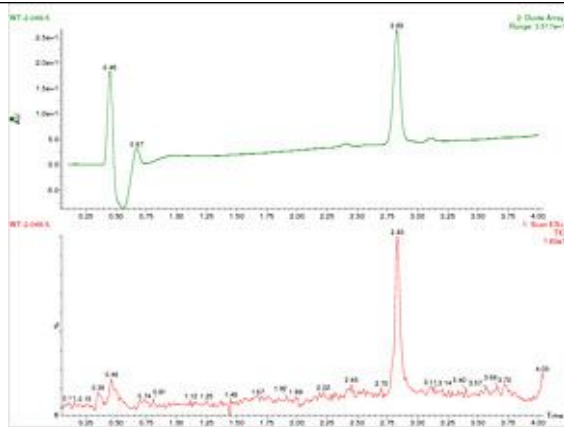

1. Diaz, R.; Luengo-Arratta, S. A.; Seixas, J. D.; Amata, E.; Devine, W.; Cordon-Obras, C.; Rojas-Barros, D. I.; Jimenez, E.; Ortega, F.; Crouch, S.; Colmenarejo, G.; Fiandor, J. M.; Martin, J. J.; Berlanga, M.; Gonzalez, S.; Manzano, P.; Navarro, M.; Pollastri, M. P., Identification and characterization of hundreds of potent and selective inhibitors of *Trypanosoma brucei* growth from a kinase-targeted library screening campaign. *PLoS Negl Trop Dis* **2014**, *8* (10), e3253.
